# Supplementary material for: A long-term study on zooplankton in two contrasting cascade reservoirs (Iguaçu River, Brazil): effects of inter-annual, seasonal, and environmental factors
Source: PeerJ. 2020 May 5;8:e8979. doi: 10.7717/peerj.8979 (PMC7207214; doi:10.7717/peerj.8979)
Supplement: Data S1 [file peerj-08-8979-s001.xlsx]

## Sheet: Environmental factors
					Environmental variables
					m	μS cm−1		Cº	mg l−1	NTU	m	mg l−1	mg l−1	mg l−1	μg l−1
Year	Month	Period	Reservoir	Site	Depth	Electrical conductivity	pH	Water temperature	Dissolved oxygen	Turbidity	Secchi disk	Total phosphorus	Total nitrogen	Total dissolved solids	Chlorophyll-a
2003	July	Winter	Salto Santiago	S1	26	35	5	18.4	8.8	3.6	2	0.0133	0.45	0.01	3
2003	July	Winter	Salto Santiago	S2	41	36	4.9	19.6	6.2	3.3	2.6	0.005	5.23	0.0006	2.46
2003	July	Winter	Salto Santiago	S3	53	35	5.5	19.8	8.7	3.1	2.1	0.0408	0.3	0.0009	2.46
2003	July	Winter	Salto Santiago	S4	7.8	46	6.1	19.2	6.7	3.3	3.2	0.0483	0.53	0.0009	2.18
2003	July	Winter	Salto Osório	S5	21	35.9	5.1	20.2	7.7	4.7	3.4	0.044	0.42	0.0004	1.64
2003	July	Winter	Salto Osório	S6	26	51.5	5.1	19.6	8.6	3.2	2.7	0.013	0.59	0.01	4.64
2003	July	Winter	Salto Osório	S7	34	32.8	5.1	20.4	9.6	3.1	2.7	0.19	0.64	0.0011	3
2003	July	Winter	Salto Osório	S8	5.8	32	5.2	17	9.2	3.2	2.8	0.178	0.48	0.0009	2.46
2003	September	Winter	Salto Santiago	S1	27	45.3	6.9	20.6	8.9	3.6	1.6	0.017	0.42	0.001	4.1
2003	September	Winter	Salto Santiago	S2	57	47.5	7.2	21.5	8.5	1.6	2.3	0.008	0.36	0.0006	2.73
2003	September	Winter	Salto Santiago	S3	55	42.4	7.2	24.6	9.8	0.6	3.8	0.018	0.36	0.0009	1.09
2003	September	Winter	Salto Santiago	S4	8.2	44.5	6.8	18.7	7.5	0.8	2.8	0.023	0.36	0.0004	3.21
2003	September	Winter	Salto Osório	S5	32.5	43.5	6.9	19.5	7.2	0.7	3.5	0.017	0.43	0.0005	2.73
2003	September	Winter	Salto Osório	S6	35.5	48.9	6.1	21	5.9	0.8	3	0.022	0.3	0.0004	1.64
2003	September	Winter	Salto Osório	S7	44	45.1	6.7	21.5	6.7	0.1	3.5	0.01	0.5	0.003	0.61
2003	September	Winter	Salto Osório	S8	6.2	44.3	6.7	18.6	8	0.5	2.5	0.012	0.3	0.0009	5.46
2003	November	Summer	Salto Santiago	S1	29	44.9	6.9	22.3	8.1	3.5	1.9	0.019	0.45	0.0003	0.5
2003	November	Summer	Salto Santiago	S2	38	53.7	7.1	24.9	9.2	3.4	2.8	0.016	0.14	0.0003	0.54
2003	November	Summer	Salto Santiago	S3	56	40.9	6.6	25.5	7.6	2	2.9	0.024	0	0.0009	0.68
2003	November	Summer	Salto Santiago	S4	8	48.7	6.9	22.8	5.9	2.3	3.5	0.021	0.34	0.0001	0.45
2003	November	Summer	Salto Osório	S5	33	50	6.9	22.6	9.5	3.4	3.1	0.023	0.35	0.0011	1.61
2003	November	Summer	Salto Osório	S6	29.5	62.9	7.9	24.6	4.7	3.2	2.4	0.02	0.2	0.0011	0.49
2003	November	Summer	Salto Osório	S7	41	46.7	7.6	23.9	7.9	1.9	4.5	0.019	0.1	0.0002	0.62
2003	November	Summer	Salto Osório	S8	6	47.9	7	22.6	8.2	2.1	4	0.014	0.3	0.09	0.38
2004	January	Summer	Salto Santiago	S1	28	44.9	7	26.9	7.5	4.3	1.8	0.067	0.03	0.0011	0.47
2004	January	Summer	Salto Santiago	S2	76	50	5.2	26.8	10	1.3	3.1	0.037	0.03	0.0021	0.32
2004	January	Summer	Salto Santiago	S3	74	48.6	7.3	28.5	10.3	1.4	3.2	0.119	1.2	0.0002	0.26
2004	January	Summer	Salto Santiago	S4	9	47.8	6.8	23.9	8	1.4	2.2	0.039	0.0028	0.0002	0.16
2004	January	Summer	Salto Osório	S5	33	57.4	7	23.2	7.7	1.5	2.2	0.031	0.029	0.0007	0.2
2004	January	Summer	Salto Osório	S6	23	50.4	7.5	29	6.4	1.9	3.2	0.057	0.02	0.0005	0.08
2004	January	Summer	Salto Osório	S7	36	47.8	7.7	27.9	8.9	1.7	3	0.023	0.9	0.0015	0.14
2004	January	Summer	Salto Osório	S8	7	49.2	6.7	24.4	8.2	1.4	1.5	0.074	0.01	0.0009	0.14
2004	March	Summer	Salto Santiago	S1	28	49	6.9	23.5	8.5	6.2	2	0.028	6.77	0.0016	0.55
2004	March	Summer	Salto Santiago	S2	54	47	7.1	27.6	6.6	3.3	2.5	0.028	5.53	0.0023	0.27
2004	March	Summer	Salto Santiago	S3	68	47.9	7.8	27.7	7.1	1.9	2.9	0.036	5.22	0.0012	0.27
2004	March	Summer	Salto Santiago	S4	8	49	6.7	25	5.1	4.3	1.9	0.028	5.21	0.0017	0.27
2004	March	Summer	Salto Osório	S5	30	48.4	6.7	24.1	5.8	3	2.9	0.057	5.8	0.001	1.09
2004	March	Summer	Salto Osório	S6	23	45.6	6.8	25.5	6.9	3.8	2.6	0.071	5.3	0	1.91
2004	March	Summer	Salto Osório	S7	43	47.2	7.3	27.2	4.2	2.3	2.9	0.061	5.1	0.002	2.73
2004	March	Summer	Salto Osório	S8	6	48.7	6.5	25.9	5.8	3.4	2	0.063	5	0.09	0.27
2004	May	Winter	Salto Santiago	S1	27	44.2	6.4	20.2	6.6	4.2	2.1	0.03	4.66	0.001	3.55
2004	May	Winter	Salto Santiago	S2	51	43.1	6.5	21.2	5.6	2.2	2.9	0.031	2.91	0.01	1.64
2004	May	Winter	Salto Santiago	S3	67	44.2	6.4	21.7	6.2	21.2	3.4	0.029	3.22	0.0048	1.09
2004	May	Winter	Salto Santiago	S4	7.8	46.2	7.2	21.2	7.3	1.3	3.3	0.035	4.55	0.001	9.83
2004	May	Winter	Salto Osório	S5	33	43.1	7.4	22.3	6	2.7	2.5	0.066	4.3	0.0008	1.37
2004	May	Winter	Salto Osório	S6	36	44.6	7.1	21.9	8.5	7.1	1.7	0.065	2.9	0.0007	3.55
2004	May	Winter	Salto Osório	S7	42	43.8	6.3	22.8	7	2.9	2.5	0.066	3	0.006	1.37
2004	May	Winter	Salto Osório	S8	5.8	43.8	6.4	22.5	6.7	4.6	2	0.081	3.9	0.0011	0.27
2004	July	Winter	Salto Santiago	S1	34	41	6.6	17.1	7.5	5.8	1.4	0.068	0.53	1.9	0.55
2004	July	Winter	Salto Santiago	S2	63	41.1	7.2	17.4	8	2.9	3.1	0.068	0.28	1.7	5.19
2004	July	Winter	Salto Santiago	S3	75	41.6	7.2	18.5	7.4	2.5	3	0.045	0.22	1	0.55
2004	July	Winter	Salto Santiago	S4	8.8	42.4	6.8	17.2	6.9	2.6	2.9	0.05	0.11	0.6	0.27
2004	July	Winter	Salto Osório	S5	23	43.3	7.1	12.9	7.3	2.6	3.1	0.057	0.49	0.7	5.3
2004	July	Winter	Salto Osório	S6	26	42.2	7.1	17	7.5	3.2	2.8	0.056	0.3	3.5	1.09
2004	July	Winter	Salto Osório	S7	34	42.2	7.1	17	7.5	3.2	2.8	0.046	0.2	3.5	1.09
2004	July	Winter	Salto Osório	S8	5.9	41.1	6.9	17.4	8	4.6	2	0.047	0.1	3.2	0.27
2004	September	Winter	Salto Santiago	S1	43	45.1	8.8	20.2	8.1	5.5	1.7	0.042	0.42	2.4	0.27
2004	September	Winter	Salto Santiago	S2	65	41.8	8.7	21.3	8.1	2.4	3.4	0.052	0.36	1.7	1.37
2004	September	Winter	Salto Santiago	S3	68	41	9.2	21.7	8.4	1.1	4.9	0.047	0.36	2.9	4.1
2004	September	Winter	Salto Santiago	S4	8.6	41.5	8.6	18.3	7.4	2.3	2.8	0.046	0.36	0.6	0.27
2004	September	Winter	Salto Osório	S5	41	41.5	9.1	18.5	7.8	2.3	2.9	0.044	0.4	1	0.55
2004	September	Winter	Salto Osório	S6	23	42	9.3	20.3	8.4	2.6	3	0.044	0.31	2.1	0.14
2004	September	Winter	Salto Osório	S7	44	41.4	8.8	21.3	8.5	2.1	3.5	0.035	0.29	1.2	1.09
2004	September	Winter	Salto Osório	S8	6.3	42.7	8.5	18.7	7.7	2.6	3	0.056	0.3	0.9	0.27
2004	November	Summer	Salto Santiago	S1	32	42	6.9	23.3	7.1	6.7	1.6	0.022	0.87	3	3
2004	November	Summer	Salto Santiago	S2	79	43.5	6.5	26	7.6	4.2	2.3	0.021	0.5	1.3	0.82
2004	November	Summer	Salto Santiago	S3	64	40.5	8.1	25.2	7.8	2.6	3.6	0.037	0.45	2.4	0.4
2004	November	Summer	Salto Santiago	S4	8	41.9	7.6	20.8	7.6	4.1	2.7	0.016	0.28	1.9	0.27
2004	November	Summer	Salto Osório	S5	27	41.8	6.6	20.3	6.8	5.4	2	0.039	0.7	2	0.27
2004	November	Summer	Salto Osório	S6	34	41.6	7.5	22	7.5	4.2	2	0.057	0.5	1.2	4.37
2004	November	Summer	Salto Osório	S7	45	40.9	7.6	24.1	7.7	2.5	3.2	0.029	0.42	0.6	0.54
2004	November	Summer	Salto Osório	S8	6.1	41.1	7.7	21.1	7.6	3.8	2.3	0.029	0.3	1.9	1.64
2005	January	Summer	Salto Santiago	S1	47	39.8	6.4	22.5	4.7	5.9	1.9	0.031	0.84	1.1	1.64
2005	January	Summer	Salto Santiago	S2	71	35.4	6.5	24.5	4.5	3.9	2.3	0.037	0.9	2.8	1.64
2005	January	Summer	Salto Santiago	S3	71	38.3	6.3	26	5	3.4	2.9	0.016	1.01	1.5	0.27
2005	January	Summer	Salto Santiago	S4	7.9	38.8	6.5	23	4.5	3.6	3.1	0.031	1.18	1.8	1.37
2005	January	Summer	Salto Osório	S5	33.5	39.9	6.4	22.8	4.5	4	2.7	0.025	0.8	0.5	0.82
2005	January	Summer	Salto Osório	S6	35	42.9	6.1	23.9	4.9	5.7	2.3	0.029	0.8	3.3	2.18
2005	January	Summer	Salto Osório	S7	43	41.9	6.4	26.1	5.7	4.6	2.5	0.044	1.2	1.4	5.73
2005	January	Summer	Salto Osório	S8	6	38	6.4	23	4.7	4.1	2.6	0.016	1.09	0.5	1.09
2005	March	Summer	Salto Santiago	S1	31	45.2	6.9	24.7	5.8	2.7	3.2	0.044	0.36	0.8	1.91
2005	March	Summer	Salto Santiago	S2	56	41.5	7.4	26.1	8.7	2.6	3.4	0.057	0.48	1.1	1.09
2005	March	Summer	Salto Santiago	S3	61	36.5	7.4	26.4	7.5	3.2	2.9	0.056	0.36	0.9	2.46
2005	March	Summer	Salto Santiago	S4	7.6	38.9	7	24.4	5.7	3.2	3.9	0.047	0.35	0.6	1.09
2005	March	Summer	Salto Osório	S5	32	39.4	8	24.7	4.9	3.7	4	0.056	0.35	2.6	0.27
2005	March	Summer	Salto Osório	S6	37	49	6.9	26.1	5.4	2.9	3.3	0.065	0.42	1.9	0.27
2005	March	Summer	Salto Osório	S7	43	35.8	6.8	26.2	5.8	2.6	3.6	0.134	0.31	2	0.27
2005	March	Summer	Salto Osório	S8	5.6	35.7	6.8	26.3	5.1	2.6	3.1	0.098	0.32	1.3	0.27
2005	May	Winter	Salto Santiago	S1	35	110.6	6.3	20.5	5.5	4.4	2.4	0.027	0.22	1.1	1.09
2005	May	Winter	Salto Santiago	S2	65	114.7	6.6	21.6	5.3	3.7	3.1	0.011	0	0.2	0.82
2005	May	Winter	Salto Santiago	S3	49	107.4	6.5	21.5	5.9	5	3.1	0.014	1.23	1	3.28
2005	May	Winter	Salto Santiago	S4	7.4	106.3	6.3	21.4	6.4	6.6	2.5	0.011	0.92	0.9	1.64
2005	May	Winter	Salto Osório	S5	29	102.8	6.6	20.8	6.3	4	2.6	0.017	0.22	0.7	1.09
2005	May	Winter	Salto Osório	S6	36	106.9	6.3	22.1	6.1	7.4	1.8	0.021	0.001	0.8	1.91
2005	May	Winter	Salto Osório	S7	34	106.6	6.3	22.5	6.3	4.4	2.2	0.082	1.1	0.8	0.82
2005	May	Winter	Salto Osório	S8	5.4	107.9	6.4	22.2	5.3	6.5	1.9	0.028	0.8	1.2	0.27
2005	July	Winter	Salto Santiago	S1	49	26	6.4	16.7	6.5	6.9	2	0.056	0	1.6	0.55
2005	July	Winter	Salto Santiago	S2	76	24.9	6.8	17.9	7.3	4.7	2.8	0.056	0.17	0.3	2.73
2005	July	Winter	Salto Santiago	S3	73	28.7	7.3	17.8	6.5	3.5	3.1	0.02	0.28	2.4	0.82
2005	July	Winter	Salto Santiago	S4	8.1	25.5	7.7	17.8	6.6	3.7	2.2	0.028	0.14	1	0.27
2005	July	Winter	Salto Osório	S5	37	32.1	6.6	17.9	5.3	3.6	2.8	0.053	0.001	1	0.82
2005	July	Winter	Salto Osório	S6	23	34.9	6.8	17.5	15.9	5.6	2.1	0.106	0.15	0.7	1
2005	July	Winter	Salto Osório	S7	45	27.2	5.6	17.8	8.5	2.8	2.7	0.032	0.26	1.3	3.55
2005	July	Winter	Salto Osório	S8	6.5	27.7	5.2	17.8	6.5	4.4	2.9	0.045	0.15	0.8	0.55
2005	September	Winter	Salto Santiago	S1	46	35.3	6.3	16.4	4.4	8.7	1.3	0.042	1.01	1.6	0.55
2005	September	Winter	Salto Santiago	S2	47	34.1	6.2	17.4	6.6	4.2	2.2	0.023	0.62	0.3	1.09
2005	September	Winter	Salto Santiago	S3	66	36	6.4	17.1	6.9	4.9	2.4	0.025	0.92	2.4	0.27
2005	September	Winter	Salto Santiago	S4	7.8	34.1	6.4	17	6.7	4.8	2.1	0.024	1.09	1	0.2
2005	September	Winter	Salto Osório	S5	31	34.3	7	17.1	8.4	4.6	2.2	0.034	0.8	1	0.82
2005	September	Winter	Salto Osório	S6	36	35.5	7	17	9.4	5	2.2	0.037	0.6	0.7	0.27
2005	September	Winter	Salto Osório	S7	39	35.9	7.1	17.2	9.4	5.6	2.3	0.075	0.98	1.3	2.18
2005	September	Winter	Salto Osório	S8	5.9	35	7	17.2	9	5.4	2.3	0.06	0.88	0.8	0.23
2005	November	Summer	Salto Santiago	S1	48	56.6	5.9	22.6	5.7	8.1	1.1	0.091	0.2	2.5	2.46
2005	November	Summer	Salto Santiago	S2	33	63.1	8	23	6.8	5.2	1.5	0.028	0.17	2.5	4.37
2005	November	Summer	Salto Santiago	S3	46	66.7	8	27.9	6.2	4.6	1.9	0.015	0.17	8.16	2.73
2005	November	Summer	Salto Santiago	S4	7.7	65	7.2	23.5	6.3	6.7	1.5	0.054	0.2	2.5	1.64
2005	November	Summer	Salto Osório	S5	21	63.2	6.7	24.2	6.6	7.9	1.5	0.031	0.2	3.6	3.28
2005	November	Summer	Salto Osório	S6	23	61.7	5.9	25.5	6.8	7.4	1.4	0.031	0.16	3.95	4.64
2005	November	Summer	Salto Osório	S7	35	64.8	6.5	27	5.9	6.6	2.2	0.041	0.18	4.4	0.54
2005	November	Summer	Salto Osório	S8	5.8	63.9	6.3	23.4	6.8	7.8	1.6	0.05	0.18	4.4	0.55
2006	January	Summer	Salto Santiago	S1	44	39.2	7.8	26.6	6.9	8.4	1.8	0.033	0.31	3.4	2.46
2006	January	Summer	Salto Santiago	S2	59	64.3	7.4	29	5.2	3.9	3.7	0.028	0.14	1.7	1.37
2006	January	Summer	Salto Santiago	S3	72	64.9	6.8	28.5	6.6	3.4	3.4	0.041	0.03	1	0.27
2006	January	Summer	Salto Santiago	S4	8.1	66.3	7.5	21.9	4.4	8.1	2.8	0.045	0.11	0.7	0.27
2006	January	Summer	Salto Osório	S5	36	34.6	7.3	26.6	5.7	8.3	2.5	0.011	0.32	1	0.55
2006	January	Summer	Salto Osório	S6	23	38	7.6	27.1	6.9	6.6	2.4	0.019	0.14	0.8	2.46
2006	January	Summer	Salto Osório	S7	44	34.9	7.9	28.1	7.6	5.3	3.3	0.043	0.03	31.5	2.18
2006	January	Summer	Salto Osório	S8	6.2	36	7.4	24.5	5.2	3.4	3.2	0.027	0.2	0.6	0.46
2006	March	Summer	Salto Santiago	S1	40	39.4	6.4	24.8	4.5	5.3	2.3	0.027	0.5	1.4	3.28
2006	March	Summer	Salto Santiago	S2	57	35.9	7.1	25	5.4	6.2	3	0.035	0.42	0.6	8.46
2006	March	Summer	Salto Santiago	S3	62	38.7	6.2	25.5	5.7	7.2	3.1	0.024	0.17	2.8	0.27
2006	March	Summer	Salto Santiago	S4	8	33.2	6.6	24.1	4.9	4.6	3	0.051	0.56	1.2	0.55
2006	March	Summer	Salto Osório	S5	35	36.4	6.2	22.5	5.2	5.8	2.5	0.06	0.49	0.7	0.55
2006	March	Summer	Salto Osório	S6	36	33.4	6.1	24	5.3	5.7	2.5	0.031	0.38	2	1.86
2006	March	Summer	Salto Osório	S7	49	32.9	6.3	24	5.7	3.9	2.8	0.016	0.15	1.6	1.37
2006	March	Summer	Salto Osório	S8	6	36.7	6	23.5	5.8	6.1	2	0.022	0.42	0.4	0.27
2006	May	Winter	Salto Santiago	S1	31	61.6	6.1	19.6	8.1	5.3	2.3	0.111	0.25	0.8	1.64
2006	May	Winter	Salto Santiago	S2	53	59	5.5	21.3	8.8	3.3	3.2	0.076	0.14	0.9	0.82
2006	May	Winter	Salto Santiago	S3	63	46	5.7	21.1	6.2	3	2.8	0.113	0.34	0.8	0.82
2006	May	Winter	Salto Santiago	S4	7.7	63.8	7.2	20.8	10.8	2.9	3.8	0.052	0.25	1.4	5.46
2006	May	Winter	Salto Osório	S5	31	47.6	7.3	21.1	10.7	3	4.5	0.031	0.22	0.5	0.27
2006	May	Winter	Salto Osório	S6	25	46.2	7.4	21.5	8.6	3.2	4.1	0.028	0.12	0.4	3.28
2006	May	Winter	Salto Osório	S7	43	44.9	6.9	21.7	8.2	4.1	4.4	0.022	0.31	1.7	2.18
2006	May	Winter	Salto Osório	S8	5.6	46.9	7.9	21.8	4.3	5.2	3.4	0.025	0.28	1	1.09
2006	July	Winter	Salto Santiago	S1	31	44	7.5	19.2	7.5	6.4	2.9	0.06	0.7	0.2	1.09
2006	July	Winter	Salto Santiago	S2	42	42.1	7.4	20.4	7.4	5.7	3.7	0.053	0.28	0.2	0.27
2006	July	Winter	Salto Santiago	S3	51	38.2	7.3	20.1	5.3	7.7	3.4	0.041	0.14	1.2	0.27
2006	July	Winter	Salto Santiago	S4	8.3	43.5	7.9	20	8	4.6	4.2	0.037	2.02	1.5	0.27
2006	July	Winter	Salto Osório	S5	31	40.1	7.6	19	8.5	4.3	3.5	0.111	0.53	0.8	0.82
2006	July	Winter	Salto Osório	S6	34	41.7	8.3	19.8	8	4.6	2.4	0.031	0.17	1	1.91
2006	July	Winter	Salto Osório	S7	41	43.5	7.3	20	5.6	3.6	4.1	0.035	0.7	0.3	0.1
2006	July	Winter	Salto Osório	S8	5.8	47.8	6.7	18	8.7	4.8	4.4	0.038	0	0.9	0.27
2006	September	Winter	Salto Santiago	S1	26	62.8	7.6	20.2	7	1.8	2.6	0.049	0.62	2.3	1.37
2006	September	Winter	Salto Santiago	S2	45	61.5	7.3	19.9	7.9	4.2	3.5	0.035	0.4	2.4	1.91
2006	September	Winter	Salto Santiago	S3	50	53.5	7.8	20	7.8	0	3.5	0.031	0.5	1.9	3.55
2006	September	Winter	Salto Santiago	S4	7.7	56.1	7.8	20	6.3	0.8	4	0.016	0.34	2.3	1.09
2006	September	Winter	Salto Osório	S5	37	52.6	7.6	12	6.1	2.4	2.7	0.019	0.45	3.9	0.27
2006	September	Winter	Salto Osório	S6	32	57.5	8.2	19.5	7.7	0.3	3.4	0.027	0.03	1.2	2.18
2006	September	Winter	Salto Osório	S7	38	71	8.7	21.1	9.9	0	3.7	0.026	0.25	1	0.82
2006	September	Winter	Salto Osório	S8	5.8	57.2	7.1	19.7	6.9	3.6	3.7	0.029	0.56	1.7	1.37
2006	November	Summer	Salto Santiago	S1	30	58.6	7	25.2	8.1	6	2.1	0.047	0.81	3.1	1.09
2006	November	Summer	Salto Santiago	S2	53	52.9	7.1	26	7.8	5	2.6	0.022	0.76	1.2	0.82
2006	November	Summer	Salto Santiago	S3	56	49.6	7	26	7.9	4.7	3.4	0.065	0.7	2.4	8.19
2006	November	Summer	Salto Santiago	S4	7.98	47.2	8.2	22.6	8.4	3.4	5	0.046	0.53	1.9	0.27
2006	November	Summer	Salto Osório	S5	27	68	7.6	22.8	6.9	4.2	3.3	0.061	0.42	1.1	1.37
2006	November	Summer	Salto Osório	S6	23	82.1	8	26.1	7.8	3.7	4.4	0.06	0.59	1.1	0.82
2006	November	Summer	Salto Osório	S7	39	63.1	7.2	27.6	8.1	3.2	4.6	0.035	0.64	0.6	3.28
2006	November	Summer	Salto Osório	S8	5.98	4	8.5	23.2	3.5	4	4	0.065	0.48	1.8	2.73
2007	January	Summer	Salto Santiago	S1	37	49	6.7	28.8	7.4	2.7	2.3	0.057	0.64	0.8	0.27
2007	January	Summer	Salto Santiago	S2	56	50.3	6.8	28	8	0.9	2.9	0.036	0.308	1.5	0.55
2007	January	Summer	Salto Santiago	S3	59	50.1	7.4	28.2	7.6	2.7	2.3	0.086	1.03	2.8	0.27
2007	January	Summer	Salto Santiago	S4	7.8	50.6	6.7	24.3	5	0.2	3.5	0.036	0.81	2.5	0.55
2007	January	Summer	Salto Osório	S5	30	50.4	7	24.8	5.4	4.2	3.2	0.036	0.42	1.6	0.82
2007	January	Summer	Salto Osório	S6	32	50.3	6.7	27.4	7.5	3.5	3	0.051	0.59	3	0.27
2007	January	Summer	Salto Osório	S7	38	49.5	6.8	28.1	7.8	6.2	3.8	0.038	0.64	3.6	0.27
2007	January	Summer	Salto Osório	S8	5.8	48.6	6.6	25	5.3	2.9	2.7	0.091	0.48	1.5	0.27
2007	March	Summer	Salto Santiago	S1	41	41.5	6.8	29	7.3	13.7	1.5	0.057	0.9	1.9	0.82
2007	March	Summer	Salto Santiago	S2	71	39	6.8	26.8	7.9	10	2	0.044	0.5	1.6	1.8
2007	March	Summer	Salto Santiago	S3	70	40.5	6.7	27.5	8.9	4.3	2	0.057	0.5	0.4	0.27
2007	March	Summer	Salto Santiago	S4	8.3	47.7	6.8	25.7	4.7	3.6	2.5	0.051	1.01	2.1	0.82
2007	March	Summer	Salto Osório	S5	35	47.3	6.8	26	6	9.8	2	0.091	0.8	1.4	2.46
2007	March	Summer	Salto Osório	S6	33	37.2	6.8	26.9	6.9	6	3	0.039	0.5	7.3	1.09
2007	March	Summer	Salto Osório	S7	40.5	41.3	6.9	27.2	7.4	9.2	4.5	0.09	0.55	1.7	1.09
2007	March	Summer	Salto Osório	S8	6.3	42.9	6.8	26	5.5	20.1	2	0.06	1	7.5	0.55
2007	May	Winter	Salto Santiago	S1	44	43.3	8.1	21	6.7	19.9	1.1	0.059	0.39	2.8	1.37
2007	May	Winter	Salto Santiago	S2	67	46.5	7.9	22.1	6.6	7.8	2.7	0.053	0.28	2	1.09
2007	May	Winter	Salto Santiago	S3	81	48.2	7.2	22.5	6.1	5.9	3.3	0.041	0.62	3.7	1.37
2007	May	Winter	Salto Santiago	S4	8.9	47.7	7.9	22.3	6.6	6.1	2.6	0.055	0.56	2.5	0.82
2007	May	Winter	Salto Osório	S5	30	47.4	7.5	22.2	7.7	8.3	2.6	0.047	0.37	2.3	5.46
2007	May	Winter	Salto Osório	S6	24	47.6	7.1	22.2	6.9	7	2.6	0.052	0.25	0.5	9.56
2007	May	Winter	Salto Osório	S7	48.8	48.1	7.3	22.4	7.2	8	2.2	0.049	0.59	2.5	4.1
2007	May	Winter	Salto Osório	S8	6.6	47.9	7.9	22.3	6.8	7.3	2	0.061	0.52	0.3	5.84
2007	July	Winter	Salto Santiago	S1	32	40.2	6.6	17.4	7.5	6.9	1.6	0.248	0.42	1.5	0.27
2007	July	Winter	Salto Santiago	S2	65	41.8	7	18.3	8.3	5.7	1.8	0.22	0.56	1	2.18
2007	July	Winter	Salto Santiago	S3	67	42.9	7.1	18.3	7.7	3.3	2.4	0.263	0.81	0.2	0.55
2007	July	Winter	Salto Santiago	S4	8	41.2	6.9	18.2	8	4.9	2.1	0.275	0.98	1.4	0.27
2007	July	Winter	Salto Osório	S5	33	42.1	7.1	18.3	8.8	3	2	0.25	0.36	1.5	0.27
2007	July	Winter	Salto Osório	S6	36	42.3	6.6	18	7.9	6.7	1.7	0.241	0.5	0.7	0.55
2007	July	Winter	Salto Osório	S7	43	42.8	7.1	18.5	8.2	5.2	2.3	0.215	0.74	0.7	0.55
2007	July	Winter	Salto Osório	S8	5.9	41.5	8.3	18.4	8.1	4.9	1.6	0.275	0.88	0.7	0.55
2007	September	Winter	Salto Santiago	S1	34	47.1	7.2	18.1	7.2	5.1	2.1	0.282	0.09	3	1.64
2007	September	Winter	Salto Santiago	S2	61	45	7.1	19.6	7.8	3.4	1.9	0.289	0.1	1.5	2.46
2007	September	Winter	Salto Santiago	S3	58	44.5	7.2	21.6	8.2	7.1	1.2	0.252	0.05	3.4	0.55
2007	September	Winter	Salto Santiago	S4	7.7	44.7	6.6	18.2	6.8	7	2.8	0.251	0.08	0.7	1.09
2007	September	Winter	Salto Osório	S5	36	43	7	18.2	6.9	7.4	2.7	0.243	0.088	0.5	0.27
2007	September	Winter	Salto Osório	S6	35	43.6	7.2	18.6	7	5.5	2.4	0.241	0.077	0.3	0.55
2007	September	Winter	Salto Osório	S7	41	44.1	7.5	20.5	8.1	3.3	3.3	0.269	0.05	0.6	3
2007	September	Winter	Salto Osório	S8	5.7	43	7.6	18.7	7.3	1.9	2.5	0.245	0.07	1	3.82
2007	November	Summer	Salto Santiago	S1	34	50.3	7.6	20.7	6.5	9.5	1.5	0.252	1.85	0.7	0.27
2007	November	Summer	Salto Santiago	S2	39	45.1	6.4	21.6	6.9	9.7	2	0.243	0.53	1.5	0.27
2007	November	Summer	Salto Santiago	S3	57	42	6.5	22.8	6.7	5.5	2.6	0.235	0.06	1	0.82
2007	November	Summer	Salto Santiago	S4	7.8	44.5	7.2	22.2	6.1	6.7	2.6	0.232	0.28	1.4	0.27
2007	November	Summer	Salto Osório	S5	31	44.6	7.2	21.9	5.8	22.5	1	0.249	1.7	5.1	0.55
2007	November	Summer	Salto Osório	S6	47	43	7.8	21	6.9	6.6	2.6	0.241	0.4	2.1	1.37
2007	November	Summer	Salto Osório	S7	40	41.8	7.8	22	6.4	5.1	2.6	0.24	0.04	1.5	0.82
2007	November	Summer	Salto Osório	S8	5.9	40.3	7.4	20.9	5.5	5.1	3	0.245	0.18	1.4	0.27
2008	January	Summer	Salto Santiago	S1	40	46.6	7.2	23.8	5.1	9.3	1.7	0.252	0.78	2.1	1.37
2008	January	Summer	Salto Santiago	S2	59	44	7.4	26.2	7.2	4	2.1	0.241	0.67	3.6	2.73
2008	January	Summer	Salto Santiago	S3	55	43.9	7.6	27.6	6.8	2.8	4.2	0.231	1.01	2.1	0.82
2008	January	Summer	Salto Santiago	S4	8.2	46.4	6.9	23.4	5.6	5.4	2.7	0.235	0.7	2.7	0.55
2008	January	Summer	Salto Osório	S5	42	46.6	7.2	23.8	5.4	4.4	2.9	0.235	0.74	1.9	0.27
2008	January	Summer	Salto Osório	S6	30	46.4	6.9	24.2	5.9	4.4	3	0.233	0.59	2.1	0.82
2008	January	Summer	Salto Osório	S7	41	47.1	7.1	26.9	6.3	3.3	3.9	0.231	1	1.5	0.82
2008	January	Summer	Salto Osório	S8	6.2	46.1	7	24.1	5.9	2.8	3	0.24	0.6	1.4	0.27
2008	March	Summer	Salto Santiago	S1	35	44	6.3	24.6	4.3	12.6	1.4	0.223	0.56	1	1.37
2008	March	Summer	Salto Santiago	S2	43	41.6	6.3	26.2	6.4	10.5	2	0.249	0.42	1	0.27
2008	March	Summer	Salto Santiago	S3	47	41.7	6.4	27	8.1	10.5	1.8	0.257	0.168	2	0.55
2008	March	Summer	Salto Santiago	S4	7.66	42.3	6.3	24.2	5.5	11.2	3	0.239	0.364	2.2	2
2008	March	Summer	Salto Osório	S5	34	41.8	6.4	24.3	5.6	7.8	2.4	0.235	0.5	1	0.27
2008	March	Summer	Salto Osório	S6	33	40.9	6.5	26.3	7.1	3.3	2.2	0.234	0.64	1.4	0.55
2008	March	Summer	Salto Osório	S7	40	42	6.4	27.8	8.6	2.7	2.7	0.227	0.2	1.9	0.55
2008	March	Summer	Salto Osório	S8	5.66	42.5	5.9	25.1	6	2.7	2.5	0.231	0.028	1.3	1.37
2008	May	Winter	Salto Santiago	S1	35	46.6	7.5	20.6	8.1	3.1	1.9	0.24	0.59	1.3	3
2008	May	Winter	Salto Santiago	S2	57	53.2	7.5	21.1	8	3.6	3.3	0.235	1.04	1.3	1.91
2008	May	Winter	Salto Santiago	S3	63	54.1	7.6	21.3	7.8	0.1	3.5	0.235	1.15	10.2	0.55
2008	May	Winter	Salto Santiago	S4	7.9	47.3	7.3	21.4	6.7	3.5	2.7	0.236	0.45	1	0.55
2008	May	Winter	Salto Osório	S5	29	85.8	7.4	21.2	7.7	9.9	2.9	0.246	0.616	3.6	1.64
2008	May	Winter	Salto Osório	S6	57.7	52.1	7.7	21.6	7.4	3.9	2.7	0.255	0.392	2.5	1.37
2008	May	Winter	Salto Osório	S7	43	57.9	7.6	21.9	8	2.8	3.4	0.252	0.476	9.7	1.37
2008	May	Winter	Salto Osório	S8	5.9	62.4	7.1	21.6	6.8	5.8	2.7	0.261	1.46	2	0.27
2008	July	Winter	Salto Santiago	S1	41	43.6	6.7	16.7	7.4	12.1	1.5	0.261	0.448	7.5	0.27
2008	July	Winter	Salto Santiago	S2	33	47.5	7.1	17.9	7.8	2.5	3	0.267	0.336	0.7	0.27
2008	July	Winter	Salto Santiago	S3	68	46.8	7.1	18.1	7.1	2.3	3.7	0.245	0.76	0.7	0.27
2008	July	Winter	Salto Santiago	S4	7.77	4.7	6.8	18	6.4	0.6	2.6	0.275	0.78	1.3	1.91
2008	July	Winter	Salto Osório	S5	36	45.1	6.8	18	7	0.8	2.3	0.312	0.73	1.9	0.27
2008	July	Winter	Salto Osório	S6	29	47.4	6.6	18.1	6.1	2.3	1.9	0.275	0.78	1.4	0.27
2008	July	Winter	Salto Osório	S7	38	46.9	6.7	18.2	7.7	2.5	3.1	0.285	0.53	1.5	1.09
2008	July	Winter	Salto Osório	S8	6.3	48	7	17.8	7.8	0	2.4	0.246	0.62	1.9	2.45
2008	September	Winter	Salto Santiago	S1	35	46.8	7.4	18	8.2	6.4	1.7	0.223	0.36	2.1	0.82
2008	September	Winter	Salto Santiago	S2	33	44.1	7.5	19.4	8.3	4	2.3	0.218	1.15	1.6	0.27
2008	September	Winter	Salto Santiago	S3	61	43.7	7.4	19.3	8.2	3	2.8	0.215	0.5	0.9	22.93
2008	September	Winter	Salto Santiago	S4	8	50.9	7.1	18.8	8	4.5	2.5	0.215	1.82	2.3	0.27
2008	September	Winter	Salto Osório	S5	21	45.2	7.2	18	8.1	3.2	2.7	0.228	0.17	1.9	3.28
2008	September	Winter	Salto Osório	S6	31	49.5	7	18.2	7.9	3	1.5	0.227	0.67	1.5	0.5
2008	September	Winter	Salto Osório	S7	44	46.5	7.1	19	8.2	2.7	1.8	0.241	0.62	1.5	0.27
2008	September	Winter	Salto Osório	S8	6.1	45.9	6.9	18.1	6.9	6.5	2.7	0.233	0.45	0.3	0.27
2008	November	Summer	Salto Santiago	S1	52	39.9	6.6	22.1	6.8	8.2	1.6	0.24	0.5	4.8	0.82
2008	November	Summer	Salto Santiago	S2	77	40.7	7.2	23.8	8	5	1.5	0.234	0.112	6.7	0.82
2008	November	Summer	Salto Santiago	S3	64	44.3	8.2	25.5	8.3	0.2	3	0.23	0.25	5.8	0.82
2008	November	Summer	Salto Santiago	S4	8.1	42.4	7	21.1	9.8	4.3	2	0.228	0.168	6.1	0.55
2008	November	Summer	Salto Osório	S5	39	42.8	6.7	21.3	8.1	4	2.5	0.234	0.03	8.4	0.37
2008	November	Summer	Salto Osório	S6	44	44.4	6.8	22.1	8.4	4.2	2.4	0.239	0.59	2.2	0.55
2008	November	Summer	Salto Osório	S7	43	43.7	7.2	24	7.6	2.6	2.3	0.249	0.28	2	0.27
2008	November	Summer	Salto Osório	S8	6.11	45.3	6.9	21.4	8.5	6.6	2.7	0.24	0.22	1.9	0.27
2009	January	Summer	Salto Santiago	S1	42	42.9	6.8	25.1	7.1	4.2	2.1	0.23	0.25	1.5	0.55
2009	January	Summer	Salto Santiago	S2	66	42	7	26.4	7.8	3.9	2.9	0.221	0.2	1.6	0.27
2009	January	Summer	Salto Santiago	S3	67	42.6	6.7	27.1	8.1	3.4	3	0.22	0.06	0.6	0.27
2009	January	Summer	Salto Santiago	S4	8.1	43.7	6.6	24.8	7.2	3.3	3.2	0.218	0.11	3.5	0.55
2009	January	Summer	Salto Osório	S5	36	43.9	6.7	23.5	6.8	4.7	3	0.225	0.5	1.7	0.55
2009	January	Summer	Salto Osório	S6	31	44.4	6.8	25	8.8	8.8	2.6	0.225	0.62	1.3	0.36
2009	January	Summer	Salto Osório	S7	41	43.9	6.8	27.4	7.7	4.6	2.5	0.221	0.36	2.1	0.27
2009	January	Summer	Salto Osório	S8	6.15	44.8	7.9	25	5.3	5.9	2.5	0.226	0.53	0.7	0.27
2009	March	Summer	Salto Santiago	S1	48	50.4	6.8	24.8	5.7	0	2.9	0.233	0.896	2.1	0.27
2009	March	Summer	Salto Santiago	S2	51	46.4	7.1	25.8	7.2	2.3	3.6	0.235	0.7	1.4	0.55
2009	March	Summer	Salto Santiago	S3	59	42.6	7.7	27.4	7.4	0	2.9	0.233	0.504	3.1	0.27
2009	March	Summer	Salto Santiago	S4	7.6	44.1	7.3	24.5	7.2	1.8	4.3	0.233	0.616	1.7	0.27
2009	March	Summer	Salto Osório	S5	23	44	7.5	25	5.8	0.3	4	0.226	0.95	2.4	0.27
2009	March	Summer	Salto Osório	S6	35	43.7	6.9	26	6.2	0.1	4.1	0.229	0.48	2	0.27
2009	March	Summer	Salto Osório	S7	45	48.9	7.6	26.2	7.4	0	2.6	0.222	0.59	3.9	0.82
2009	March	Summer	Salto Osório	S8	5.4	42.7	7.3	24.8	6	3.5	2.9	0.229	0.81	2.4	0.27
2009	May	Winter	Salto Santiago	S1	34	57.5	6.5	22.8	6.4	4.8	3	0.255	1.12	1.4	0.27
2009	May	Winter	Salto Santiago	S2	44	67	6.8	23	6.6	5.1	3	0.232	0.39	3.8	0.27
2009	May	Winter	Salto Santiago	S3	54	66.6	6.8	23.1	6.5	2.9	4.3	0.227	1.74	4.1	0.27
2009	May	Winter	Salto Santiago	S4	7.8	67.4	6.8	23.8	7.9	1.9	4.4	0.229	1.32	1.2	0.27
2009	May	Winter	Salto Osório	S5	39	67.1	6.8	22.7	7.5	2.5	4.4	0.216	1.6	2	0.27
2009	May	Winter	Salto Osório	S6	23	64.5	7.3	23.5	6.5	2.1	5	0.213	0.56	1.5	0.82
2009	May	Winter	Salto Osório	S7	43	62.3	6.5	24.5	7	2.6	3.2	0.215	1.76	2.8	0.27
2009	May	Winter	Salto Osório	S8	6.1	65.7	7.3	23.7	6.3	3.9	4.1	0.213	0.9	1.2	0.27
2009	July	Winter	Salto Santiago	S1	39	42.1	7.2	17.3	7.9	13.3	2	0.223	0.76	10.5	0.27
2009	July	Winter	Salto Santiago	S2	57	45.1	7	18	8.1	11	4	0.226	0.67	9.8	0.27
2009	July	Winter	Salto Santiago	S3	58	45.1	6.8	18.1	7.6	10.3	3.9	0.225	0.62	14.8	0.27
2009	July	Winter	Salto Santiago	S4	7.7	45.9	6.9	17.4	6.8	11.6	4	0.225	0.84	11.9	0.27
2009	July	Winter	Salto Osório	S5	33	46.4	6.8	17.6	5.9	11	3	0.247	0.36	12	0.54
2009	July	Winter	Salto Osório	S6	41	45.5	6.9	17.7	6.2	12.2	3.2	0.237	0.14	11.2	0.82
2009	July	Winter	Salto Osório	S7	43	44.5	7.3	18.2	8.2	14.1	2.6	0.253	0.06	11.6	0.27
2009	July	Winter	Salto Osório	S8	5.9	42.9	7.1	17.8	6.9	14.3	2.5	0.237	0.224	9.6	0.27
2009	September	Winter	Salto Santiago	S1	36	43.5	6.9	17.2	11.7	22.5	1	0.222	0.08	3.5	1.72
2009	September	Winter	Salto Santiago	S2	68	40.6	7.5	19.3	8.8	24	1.2	0.22	0.06	2.6	0.27
2009	September	Winter	Salto Santiago	S3	48	42.3	7.2	19.5	9.4	18.2	1.7	0.214	0.056	2.1	0.55
2009	September	Winter	Salto Santiago	S4	7.6	42.5	7	17.6	12.1	18.8	1.3	0.217	0.056	2.1	0.54
2009	September	Winter	Salto Osório	S5	25	47.4	7.9	17.7	12.8	17.3	1.4	0.241	0.056	1.6	0.27
2009	September	Winter	Salto Osório	S6	34	42.4	7.3	18	11.8	18.4	1.3	0.237	0.14	2.8	0.55
2009	September	Winter	Salto Osório	S7	43	42.3	7.7	18.3	10.5	0.9	1.4	0.288	0.056	1.7	0.27
2009	September	Winter	Salto Osório	S8	5.7	50.5	7.9	18.3	10.9	19.7	1.2	0.233	0.056	2.3	0.27
2009	November	Summer	Salto Santiago	S1	28	36.4	7.3	22.3	6.8	12.6	1.5	0.021	0.31	4.2	0.27
2009	November	Summer	Salto Santiago	S2	78	38.2	9.1	27	9.1	3.8	1.3	0.041	0.336	4.2	0.27
2009	November	Summer	Salto Santiago	S3	85	41.3	9	26.9	8.9	0.3	2.4	0.054	0.14	0.7	1.64
2009	November	Summer	Salto Santiago	S4	8.9	42.1	7.4	25	8	10.3	1.5	0.021	0.08	3.8	0.27
2009	November	Summer	Salto Osório	S5	29	40	7.5	21.3	8.2	10.2	1.5	0.056	0.08	8.4	0.27
2009	November	Summer	Salto Osório	S6	39	40.1	7.5	22.9	8.1	12.4	0.9	0.041	0.39	2.7	0.27
2009	November	Summer	Salto Osório	S7	45	42.6	8.3	25.2	9.9	7.4	1.3	0.054	0.25	5.9	0.27
2009	November	Summer	Salto Osório	S8	6.9	36.7	7.6	21.8	7.6	9.7	1.1	0.038	0.21	2.8	0.27
2010	January	Summer	Salto Santiago	S1	47	49.2	7.8	24.1	7.4	22.7	1.3	0.108	0.14	3.5	0.36
2010	January	Summer	Salto Santiago	S2	70	49.9	7.7	28.2	10.8	15.9	2.1	0.021	0.112	4	0.21
2010	January	Summer	Salto Santiago	S3	76	54.2	7.8	27.2	10.4	15	2.5	0.014	0.17	3.2	0.73
2010	January	Summer	Salto Santiago	S4	8.5	37.4	6.9	27.7	9	18.1	1.6	0.057	0.056	3.8	0.36
2010	January	Summer	Salto Osório	S5	21	46.6	7.2	24	8.8	36.4	0.8	0.039	0.53	2	2.37
2010	January	Summer	Salto Osório	S6	38	43.8	7.4	24.3	8.1	17.8	1.9	0.043	0.03	1.3	1.37
2010	January	Summer	Salto Osório	S7	45	35.3	6.9	26.6	7.7	15.5	2	0.05	0.08	1.2	2.73
2010	January	Summer	Salto Osório	S8	6.5	51.6	7.1	24	7.5	22.6	1.5	0.019	0.14	2.1	1.37
2010	March	Summer	Salto Santiago	S1	52	43.2	7.3	24.3	8.3	7.2	1.6	0.065	0.064	3.9	1.37
2010	March	Summer	Salto Santiago	S2	75	43.4	7.4	26.1	7.5	4.3	2.8	0.071	0.238	1.9	4.37
2010	March	Summer	Salto Santiago	S3	74	41.1	7.7	26.7	7.9	2.9	3.4	0.061	0.378	1.6	1.37
2010	March	Summer	Salto Santiago	S4	8.4	55.5	7.4	24.7	6.7	2.9	2.5	0.063	0.196	1.4	0.27
2010	March	Summer	Salto Osório	S5	34	43.4	7.3	24.7	8.2	4.5	2.4	0.06	0.42	1.6	0.82
2010	March	Summer	Salto Osório	S6	36	46	7.5	25.4	8	2.4	2.2	0.06	0.644	1.8	0.27
2010	March	Summer	Salto Osório	S7	44	45.7	7.4	26.4	7.2	3.1	2.6	0.068	0.196	1.8	1.09
2010	March	Summer	Salto Osório	S8	6.4	44.8	7.4	26.4	5.7	4.3	2	0.062	0.112	5.6	0.27
2010	May	Winter	Salto Santiago	S1	37	37.5	6.8	19	9.4	14	0.8	0.071	0.476	4.2	1.09
2010	May	Winter	Salto Santiago	S2	84	34	7.4	19.9	10.2	8	1.2	0.063	0.616	1.9	0.27
2010	May	Winter	Salto Santiago	S3	72	38.2	7.3	20.3	9.1	7	1.5	0.08	0.42	2.4	0.27
2010	May	Winter	Salto Santiago	S4	8.3	35.6	7	20.3	7.8	7	1.3	0.086	0.448	3.1	0.27
2010	May	Winter	Salto Osório	S5	33	37.2	7.2	20.4	10.2	8	1.3	0.081	0.728	2.1	0.55
2010	May	Winter	Salto Osório	S6	23	33.6	7.2	20.2	7.9	8	1.3	0.072	0.756	1.8	0.27
2010	May	Winter	Salto Osório	S7	48	35.4	7.2	19.8	10.3	6	1.4	0.072	0.728	2.4	1.09
2010	May	Winter	Salto Osório	S8	6.3	38.9	7.3	20.3	8.5	7	1.4	0.076	0.7	1.5	0.55
2010	July	Winter	Salto Santiago	S1	43	42.3	6.7	17.3	7.5	4.1	1.8	0.071	0.56	2.6	0.55
2010	July	Winter	Salto Santiago	S2	71	40.1	6.7	18	8.8	7.9	1.4	0.061	0.364	0.7	3.82
2010	July	Winter	Salto Santiago	S3	72	40.2	6.7	18.1	8.6	5.8	1.6	0.058	0.616	1.9	4.1
2010	July	Winter	Salto Santiago	S4	8.1	39.5	6.5	18.7	8.9	5.6	1.7	0.065	0.504	1.9	2.73
2010	July	Winter	Salto Osório	S5	30	41.4	6.5	17.9	7.8	5.4	1.6	0.058	0.756	0.9	0.82
2010	July	Winter	Salto Osório	S6	40	39.7	6.6	17.8	8.6	4	1.9	0.058	0.28	1.9	0.55
2010	July	Winter	Salto Osório	S7	49	39.9	6.8	17.9	8.6	6.5	1.6	0.061	0.504	0.1	0.82
2010	July	Winter	Salto Osório	S8	6.1	40.8	6.5	17.5	8.5	5.6	1.6	0.058	0.392	4	0.82
2010	September	Winter	Salto Santiago	S1	40	48.8	7.4	19.4	9.3	3.6	1.8	0.081	0.448	2.5	1.09
2010	September	Winter	Salto Santiago	S2	82	43.7	6.8	20.4	8.6	3.3	2.8	0.06	0.308	1.2	0.55
2010	September	Winter	Salto Santiago	S3	77	40.7	6.9	20.3	8.5	3.1	2.7	0.067	0.476	1.2	0.27
2010	September	Winter	Salto Santiago	S4	8.6	46.6	7	17.9	8.3	0	2.5	0.074	0.532	1.7	0.27
2010	September	Winter	Salto Osório	S5	45	45.5	6.7	18.1	8.3	0.2	3	0.069	0.56	0.9	0.27
2010	September	Winter	Salto Osório	S6	35	43.4	6.5	19	7.4	1.6	2.7	0.096	0.56	6.6	0.27
2010	September	Winter	Salto Osório	S7	44	42.9	6	19.9	7.6	0.3	2.5	0.067	0.616	0.9	0.27
2010	September	Winter	Salto Osório	S8	6.4	43.1	6.7	18.4	8.1	3.1	2.3	0.056	0.476	1.2	0.27
2010	November	Summer	Salto Santiago	S1	38	50.9	6.6	22	7.2	4.3	1.8	0.095	0.2258	2.6	0.27
2010	November	Summer	Salto Santiago	S2	61	47.4	7	25.3	7.6	4.9	2.6	0.101	0.35	2	0.55
2010	November	Summer	Salto Santiago	S3	64	47.6	6.9	24.9	8.8	3.7	2.4	0.091	0.1849	1.9	0.27
2010	November	Summer	Salto Santiago	S4	7.5	40.2	6.4	19.9	6.6	4.7	2.8	0.102	0.302	2.5	0.27
2010	November	Summer	Salto Osório	S5	40	50.6	6.4	20.2	7.1	2.5	2.5	0.109	0.2685	2.2	0.55
2010	November	Summer	Salto Osório	S6	43	38.5	6.5	24.6	6.9	1.6	2.1	0.128	0.34	2.7	0.55
2010	November	Summer	Salto Osório	S7	48	39.3	6.5	24.6	6.6	1.9	3.1	0.111	0.4388	1.6	0.27
2010	November	Summer	Salto Osório	S8	5.6	40.2	6.4	21.3	7.2	3.5	3.1	0.111	0.3231	1.3	0.55
2011	January	Summer	Salto Santiago	S1	40	42	7.5	24.9	7.2	12.6	0.9	0.127	0.336	6.7	1.37
2011	January	Summer	Salto Santiago	S2	55	36	8.6	27.7	7.9	3.7	2.1	0.109	0.252	3.3	0.27
2011	January	Summer	Salto Santiago	S3	45	36.2	8.7	28	8	2.9	3.3	0.107	0.196	2.1	0.55
2011	January	Summer	Salto Santiago	S4	7.6	42.8	7.3	23.2	5.2	5.5	2.8	0.251	0.168	1.3	0.27
2011	January	Summer	Salto Osório	S5	38	55.5	7.5	23.2	6	4.4	2.1	0.107	0.364	4.5	0.55
2011	January	Summer	Salto Osório	S6	31	49.2	7.7	25.9	6.8	3.5	2.4	0.109	0.308	2	0.27
2011	January	Summer	Salto Osório	S7	48	49	8.1	27.5	7.6	2.5	3	0.108	0.56	3	0.27
2011	January	Summer	Salto Osório	S8	5.3	49.5	7.8	24.2	5.9	2.9	2.8	0.083	0.532	3.4	0.55
2011	March	Summer	Salto Santiago	S1	37	37.9	6.5	24.3	6.6	7.9	1.4	0.101	0.308	2.1	0.55
2011	March	Summer	Salto Santiago	S2	71	39.5	7.1	26.4	7.3	5.5	1.7	0.094	0.336	1.6	0.27
2011	March	Summer	Salto Santiago	S3	68	43.9	7	25.3	7.6	5	1.8	0.096	0.224	2.3	0.27
2011	March	Summer	Salto Santiago	S4	7.8	39	7	24.2	6.9	9.8	1.8	0.113	0.252	2.8	0.55
2011	March	Summer	Salto Osório	S5	31	39.1	7.6	24.4	7.4	6.2	1.9	0.111	0.336	2.2	0.55
2011	March	Summer	Salto Osório	S6	30	43.5	6.9	24.6	7.1	5.8	1.7	0.112	0.28	1.1	0.27
2011	March	Summer	Salto Osório	S7	34	38.3	7.3	25.9	7.6	5.1	2.1	0.111	0.392	2.6	1.09
2011	March	Summer	Salto Osório	S8	5.8	38.2	7	24.7	6.4	5.8	1.8	0.086	0.308	1.4	0.55
2011	May	Winter	Salto Santiago	S1	36	37.4	7.9	21.1	8.2	5.2	1.9	0.112	0.476	1.1	0.55
2011	May	Winter	Salto Santiago	S2	69	35.4	7.6	21.6	6.6	2.6	2.5	0.112	0.448	0.8	0.55
2011	May	Winter	Salto Santiago	S3	61	41.5	7.7	21.7	6.5	3.4	2.2	0.091	0.336	1.2	0.55
2011	May	Winter	Salto Santiago	S4	7.4	34.3	7.3	21.6	6.2	2.5	2.8	0.099	0.476	1.2	0.27
2011	May	Winter	Salto Osório	S5	31	44.1	7.4	22.1	7.9	2.7	2.1	0.126	0.196	0.6	0.27
2011	May	Winter	Salto Osório	S6	44	33.4	7.4	21.8	6.7	3.6	2.7	0.126	0.252	2.1	0.27
2011	May	Winter	Salto Osório	S7	43	49.7	7.6	22	7.8	2.5	2	0.125	0.252	2	0.27
2011	May	Winter	Salto Osório	S8	5.4	33.5	7.3	21.9	6.5	3.9	2.5	0.115	0.392	1.5	0.55
2011	July	Winter	Salto Santiago	S1	47	47.3	7.2	17.2	7.3	7.6	1.6	0.132	0.7	1.9	0.55
2011	July	Winter	Salto Santiago	S2	76	49.4	7.1	18.7	8.9	3.6	2	0.137	0.644	0.8	0.55
2011	July	Winter	Salto Santiago	S3	62	45.3	7.3	18.6	7.9	4.3	2.2	0.139	0.56	0.9	0.55
2011	July	Winter	Salto Santiago	S4	7.6	44	7.1	18.4	6.8	3	2.4	0.136	0.476	1.2	0.82
2011	July	Winter	Salto Osório	S5	34	43.3	7.3	18.4	7.5	4.3	2.1	0.112	0.448	0.8	0.27
2011	July	Winter	Salto Osório	S6	34	43.2	7.2	18.2	6.7	5.1	3.1	0.124	0.644	0.6	0.27
2011	July	Winter	Salto Osório	S7	43	43.3	7.4	18.1	7.9	3.9	2.6	0.129	0.56	1.3	0.55
2011	July	Winter	Salto Osório	S8	5.6	44	7.2	17.8	7.1	7.7	1.3	0.129	0.728	2.1	0.55
2011	September	Winter	Salto Santiago	S1	51	44.8	6.9	16.4	11.8	20	0.7	0.133	0.252	6.1	0.27
2011	September	Winter	Salto Santiago	S2	71	36.8	6.7	17.5	11	14.6	0.9	0.126	0.196	4.4	0.55
2011	September	Winter	Salto Santiago	S3	61	39.4	7	18.2	9.9	10.9	1.2	0.113	0.224	2.4	0.55
2011	September	Winter	Salto Santiago	S4	7.7	27.9	7.4	16.7	10.9	11.9	1.2	0.125	0.336	2.7	0.27
2011	September	Winter	Salto Osório	S5	43	28.6	7.3	16.9	11.3	13	1.2	0.118	0.252	3.3	0.55
2011	September	Winter	Salto Osório	S6	36	35.9	6.6	17.7	13.9	15	1	0.095	0.14	4.1	0.27
2011	September	Winter	Salto Osório	S7	44	33.9	7	16.6	14.3	15.4	1	0.13	0.112	3.8	0.27
2011	September	Winter	Salto Osório	S8	5.77	37.1	6.7	16.6	11.1	14.6	0.8	0.128	0.28	4.1	0.27
2011	November	Summer	Salto Santiago	S1	46	31.1	6.7	19.9	6.5	12.3	1.2	0.113	0.196	1	0.55
2011	November	Summer	Salto Santiago	S2	65	28.4	7.1	21.7	7.1	8.9	1.2	0.126	0.252	2.2	2.73
2011	November	Summer	Salto Santiago	S3	66	43.2	7.4	22.4	7.6	5.6	1.7	0.103	0.28	1.9	2.73
2011	November	Summer	Salto Santiago	S4	7.6	26.4	6.7	19.4	7.6	8	1.3	0.115	0.224	0.9	0.82
2011	November	Summer	Salto Osório	S5	36	27.4	6.8	19.5	7.3	10.3	1.1	0.113	0.14	2.6	1.09
2011	November	Summer	Salto Osório	S6	26	28.9	6.6	19.9	7.5	8.8	1.3	0.11	0.224	1.4	1.09
2011	November	Summer	Salto Osório	S7	46	33.5	7.1	22	7.7	7.8	1.4	0.106	0.252	0.2	1.37
2011	November	Summer	Salto Osório	S8	5.6	34.5	6.8	20.1	6.9	9.9	1.2	0.106	0.28	2.9	0.55
2012	January	Summer	Salto Santiago	S1	39	26.4	7.3	25.3	8.4	6.7	1.5	0.005	0.14	4.73	2.46
2012	January	Summer	Salto Santiago	S2	67	24.7	6.7	27.9	9.9	5.7	1.9	0.007	0.112	0.8	0.82
2012	January	Summer	Salto Santiago	S3	59	24.9	8.3	27.6	9.7	3.9	2	0.005	0.084	2.6	1.91
2012	January	Summer	Salto Santiago	S4	7.5	26.4	6.8	20.4	7.2	5.7	1.7	0.01	0.14	1.7	0.82
2012	January	Summer	Salto Osório	S5	36	22.7	6.7	22.3	8.7	4.6	1.8	0.017	0.084	1.7	0.82
2012	January	Summer	Salto Osório	S6	40	24.4	7.2	26.1	7.6	3.6	2	0.007	0.112	0.6	0.27
2012	January	Summer	Salto Osório	S7	42	24.8	7.5	27	7.6	3.5	2	0.004	0.224	1.2	1.37
2012	January	Summer	Salto Osório	S8	5.5	23.4	7	23.3	7.2	3.8	1.8	0.009	0.112	1.2	1.09
2012	March	Summer	Salto Santiago	S1	41	32.6	6.6	23.6	3.6	3.5	2.6	0.141	0.1581	2.5	0.27
2012	March	Summer	Salto Santiago	S2	91	35	4.7	25.1	2.9	4.2	3.4	0.005	0.125	2.9	0.55
2012	March	Summer	Salto Santiago	S3	71	31.9	4.9	25.2	5.6	3.5	4	0.005	0.0528	3.5	0.27
2012	March	Summer	Salto Santiago	S4	7.9	33	5.7	23.7	6.6	2.4	3.7	0.007	0.0549	6.5	0.27
2012	March	Summer	Salto Osório	S5	31	29.7	5.5	24.1	6.3	3.1	3.5	0.005	0.1726	8.3	0.55
2012	March	Summer	Salto Osório	S6	46	30.1	6.9	24.1	6.9	2.1	4.3	0.059	0.14	1.7	0.27
2012	March	Summer	Salto Osório	S7	43	29.9	6.5	24.3	5.5	2.2	3.5	0.007	0.1672	2.4	0.27
2012	March	Summer	Salto Osório	S8	5.9	30.6	6	23.6	4	3.5	3.6	0.063	0.1508	3.9	0.27
2012	May	Winter	Salto Santiago	S1	45	35.6	6.8	21.5	9.3	7.5	2.3	0.04	0.168	8	5.46
2012	May	Winter	Salto Santiago	S2	71	36.2	7.1	20.5	8.3	5.4	2.6	0.041	0.1575	13.6	2.18
2012	May	Winter	Salto Santiago	S3	71	35.6	6.9	20.7	8	5.2	3.1	0.038	0.252	14.8	2.18
2012	May	Winter	Salto Santiago	S4	8	31.2	7.2	22	6.2	4.2	3	0.035	0.154	15.4	1.64
2012	May	Winter	Salto Osório	S5	39	30.8	7.1	21.7	8.3	1.8	3.2	0.039	0.224	7	1.37
2012	May	Winter	Salto Osório	S6	24	37.1	6.4	21.4	7.8	2.1	2.4	0.046	0.168	10	0.27
2012	May	Winter	Salto Osório	S7	50	33.2	6.6	22.1	7.7	1.3	2.9	0.048	0.154	9	1.37
2012	May	Winter	Salto Osório	S8	6.1	34.1	6.5	21.3	7.2	3.1	2.2	0.044	0.266	11	2.18
2012	July	Winter	Salto Santiago	S1	38	56.5	7.5	16.8	7.9	15.9	1	0.049	0.252	0.5	0.27
2012	July	Winter	Salto Santiago	S2	75	51	7.5	19	8.5	13	1.8	0.035	0.2975	1.7	12.56
2012	July	Winter	Salto Santiago	S3	78	50.7	7.3	17.9	8.4	8	1.7	0.035	0.28	1.7	1.09
2012	July	Winter	Salto Santiago	S4	8.5	69.2	7.4	16.8	8.2	10.2	1.5	0.035	0.252	1.4	0.55
2012	July	Winter	Salto Osório	S5	34	62.2	7.2	17.7	9.3	9.5	1.6	0.038	0.238	19.9	0.27
2012	July	Winter	Salto Osório	S6	38	89.5	7.5	18	9.5	10	1.7	0.048	0.182	18.3	0.27
2012	July	Winter	Salto Osório	S7	43	66.9	7.5	18.3	9.2	11.3	1.8	0.039	0.126	14.4	0.82
2012	July	Winter	Salto Osório	S8	6.5	66.5	7.3	17.3	8	8.2	1	0.04	0.182	22.4	0.27
2012	September	Winter	Salto Santiago	S1	41	36.9	7.4	18.9	7.3	10.2	1.4	0.051	0.21	4.8	2.18
2012	September	Winter	Salto Santiago	S2	69	35.8	7.8	21.7	8.5	6.4	2	0.049	0.21	3.3	3
2012	September	Winter	Salto Santiago	S3	69	37.3	8	22.8	8.7	4.9	2.8	0.05	0.098	1.7	0.82
2012	September	Winter	Salto Santiago	S4	7.7	46.7	7.7	19	8.4	7	1.6	0.077	0.224	1.5	0.27
2012	September	Winter	Salto Osório	S5	33	38	7.2	18.7	7.2	7.1	1.9	0.059	0.112	0.6	0.27
2012	September	Winter	Salto Osório	S6	35	14.5	7.1	20	8	10	1.8	0.052	0.196	5.7	1.09
2012	September	Winter	Salto Osório	S7	44	46	7.6	22.2	8.1	6.4	1.8	0.049	0.21	12.5	0.56
2012	September	Winter	Salto Osório	S8	5.9	33.5	6.6	20.6	5	8.4	1.7	0.081	0.154	2.3	1.09
2012	November	Summer	Salto Santiago	S1	27	43.2	7.9	24.4	8.1	6.3	1.6	0.02	0.07	6.9	0.27
2012	November	Summer	Salto Santiago	S2	59	40.7	8.6	26	8.3	9	1.4	0.044	0.1925	1.9	3.55
2012	November	Summer	Salto Santiago	S3	56	39.7	8	25.3	8.1	4.5	1.4	0.029	0.07	1.5	2.73
2012	November	Summer	Salto Santiago	S4	7.6	36.1	7.4	20.8	6.6	4	1.8	0.027	0.098	4.9	0.27
2012	November	Summer	Salto Osório	S5	31	37.8	7.7	21.5	7.3	5.5	1.5	0.064	0.28	1.3	4.1
2012	November	Summer	Salto Osório	S6	40	43.1	8.1	25.5	8.1	5.8	1.6	0.009	0.056	2.1	1.64
2012	November	Summer	Salto Osório	S7	44	43.6	8.2	24.3	8.5	3	2.6	0.021	0.532	3.8	8.63
2012	November	Summer	Salto Osório	S8	5.6	36.4	7.4	21.4	6	3.7	2.3	0.022	0.196	0.9	3.82
2013	January	Summer	Salto Santiago	S1	39	56	7.3	26.1	6	5.5	1.3	0.023	0.224	5.6	0.27
2013	January	Summer	Salto Santiago	S2	67	48	8.1	26.5	7.6	4.3	2.4	0.019	0.084	1.1	0.27
2013	January	Summer	Salto Santiago	S3	62	51.1	8.1	26.6	7.3	2.8	2.1	0.016	0.084	3.3	0.82
2013	January	Summer	Salto Santiago	S4	7.8	45.1	7.5	24.4	5.8	2.7	1.8	0.013	0.028	1.2	0.82
2013	January	Summer	Salto Osório	S5	29	45.6	7.5	24.7	6	4.3	2	0.1	0.28	7	1.37
2013	January	Summer	Salto Osório	S6	36	51.5	7.5	26.8	7.3	10.8	2	0.129	0.056	2.2	1.09
2013	January	Summer	Salto Osório	S7	46	59.5	8.2	27.6	8	3.9	2.4	0.019	0.532	1.8	1.37
2013	January	Summer	Salto Osório	S8	5.9	64.5	7.3	24.7	5.6	5	2.3	0.023	0.196	5.8	0.27
2013	March	Summer	Salto Santiago	S1	37	48.1	7.8	23.3	7	7.7	1	0.041	0.266	1.75	1.37
2013	March	Summer	Salto Santiago	S2	62	47.3	7.6	23.8	5.9	6.8	1.4	0.031	0.336	0.625	2.39
2013	March	Summer	Salto Santiago	S3	63	65.6	7.9	24.5	6.8	4.4	2	0.032	0.224	1.75	1.71
2013	March	Summer	Salto Santiago	S4	8	49.2	7.3	24.3	6.2	5.3	2.1	0.031	0.21	1.62	0.68
2013	March	Summer	Salto Osório	S5	41	48.6	7.3	24.3	6	4.4	1.6	0.032	0.14	4.37	0.34
2013	March	Summer	Salto Osório	S6	37	53.1	7.7	24.6	6.6	7.6	1	0.033	0.098	1.62	1.37
2013	March	Summer	Salto Osório	S7	43	46.3	8.8	25.3	6.9	3.7	2	0.024	0.448	10.62	0.34
2013	March	Summer	Salto Osório	S8	6	46.4	8.8	24.6	5.6	5.2	2.1	0.042	0.336	3.75	2.64
2013	May	Winter	Salto Santiago	S1	42	32.8	6.9	21.1	10.7	23.4	0.9	0.025	0.56	14	1.68
2013	May	Winter	Salto Santiago	S2	64	31.1	6.6	21	7.6	12.4	1.8	0.016	0.616	5.33	2.41
2013	May	Winter	Salto Santiago	S3	67.5	31	6.6	20.9	7	4.7	2.3	0.012	0.42	16.5	8.65
2013	May	Winter	Salto Santiago	S4	7.8	31.7	6.5	20.9	6.5	3.5	2.3	0.015	0.406	11.33	5.01
2013	May	Winter	Salto Osório	S5	38	32	6.6	23.6	6.2	4.5	2.2	0.016	0.462	11.5	4.55
2013	May	Winter	Salto Osório	S6	36	32.8	6.6	21	7.3	4.6	1.3	0.015	0.28	13.66	4.1
2013	May	Winter	Salto Osório	S7	42.5	33.5	6.9	22	6.9	3.2	2.3	0.014	0.364	1	0.27
2013	May	Winter	Salto Osório	S8	5.8	33.3	6.7	21	6.5	3.9	2.4	0.011	0.518	13	2.73
2013	July	Winter	Salto Santiago	S1	56	46.3	6.7	17.4	9.7	14.1	1	0.022	0.4246	1.75	0.48
2013	July	Winter	Salto Santiago	S2	71	39.1	8.2	18.2	9.9	15.4	0.8	0.015	0.4964	3	2.25
2013	July	Winter	Salto Santiago	S3	72	42.1	6.2	18.2	9.2	7.5	1.5	0.013	0.35	2.5	1.37
2013	July	Winter	Salto Santiago	S4	8	42.9	6.7	17	8	10	1	0.023	0.7686	0.25	2.05
2013	July	Winter	Salto Osório	S5	34	39.7	6	17.8	10.2	9.5	1	0.024	0.2465	7	2.05
2013	July	Winter	Salto Osório	S6	35	43.7	7.7	17.8	10	8.5	1.2	0.023	0.2162	3	2.34
2013	July	Winter	Salto Osório	S7	36	38.8	7.7	18.4	8.9	8.6	1.3	0.016	0.2046	11.75	0.68
2013	July	Winter	Salto Osório	S8	6.1	36.5	7.1	17	10	11.3	1	0.024	0.3172	2.25	1.37
2013	September	Winter	Salto Santiago	S1	44	35.8	7.3	16.5	7	13	0.9	0.112	0.3833	5	0.27
2013	September	Winter	Salto Santiago	S2	71	38.9	8.2	18	6.7	13.1	0.8	0.116	0.4128	22.6	1.15
2013	September	Winter	Salto Santiago	S3	70	36.4	7.5	17	8.2	8.7	1.4	0.105	0.4293	2	2.73
2013	September	Winter	Salto Santiago	S4	8	38.9	8.2	16.7	7	9.1	1.4	0.106	0.4351	23	1.09
2013	September	Winter	Salto Osório	S5	31	36.8	7.3	17.5	7.3	7.8	1.6	0.022	0.3426	4	0.55
2013	September	Winter	Salto Osório	S6	36	38.2	7.9	17.3	7.1	9.8	1.1	0.018	0.3538	6	0.55
2013	September	Winter	Salto Osório	S7	33	36.9	8.2	18.6	8.6	9.9	1.5	0.024	0.3659	4.4	1.74
2013	September	Winter	Salto Osório	S8	6	41.8	7.6	17.4	6.3	8.2	1.6	0.026	0.3701	3.4	1.64
2013	November	Summer	Salto Santiago	S1	42	34.5	6.1	23.3	9	12.8	1.2	0.335	0.602	244.44	12.63
2013	November	Summer	Salto Santiago	S2	72	29.5	6	23.6	9	9.7	1.4	0.349	0.42	23.07	19.11
2013	November	Summer	Salto Santiago	S3	70	31.4	6	24.1	8.3	10.9	1.4	0.348	0.504	83.72	48.12
2013	November	Summer	Salto Santiago	S4	8	30.2	5.9	20	7.8	7.8	2	0.338	0.532	171.42	7.51
2013	November	Summer	Salto Osório	S5	34	34.6	6.1	20.1	7.6	8.6	1.9	0.016	1.19	152	3.13
2013	November	Summer	Salto Osório	S6	34	36.9	5.9	21.6	8.8	8.8	2	0.018	1.13	1.87	10.24
2013	November	Summer	Salto Osório	S7	50	36.1	7.6	24.1	9.6	21.9	0.8	0.061	0.966	12.62	14.67
2013	November	Summer	Salto Osório	S8	5.9	36.5	6.4	20.7	7.5	11.3	1.6	0.011	0.714	4	25.94
2014	January	Summer	Salto Santiago	S1	33	50.2	8.2	26	8.1	6.1	1.3	0.02	0.588	21.66	1.37
2014	January	Summer	Salto Santiago	S2	61	44.7	9.7	27	10.1	4.6	1.3	0.031	0.406	4	25.94
2014	January	Summer	Salto Santiago	S3	64	43.9	9.6	26	9.4	3.4	1.3	0.028	0.476	74.83	20.93
2014	January	Summer	Salto Santiago	S4	7.6	39.5	6	22	7.5	4.6	1.7	0.031	0.392	23.33	14.56
2014	January	Summer	Salto Osório	S5	33	46.1	7.2	23	4.7	4.8	2	0.021	1.09	23.33	4.1
2014	January	Summer	Salto Osório	S6	34	50.3	7.8	27	8.2	4.9	1.5	0.021	0.882	1	2.73
2014	January	Summer	Salto Osório	S7	44	54.1	8.9	28	10.5	3.8	2.1	0.023	0.728	16.66	3.19
2014	January	Summer	Salto Osório	S8	5.8	42.1	7.2	21	7.5	3.6	2	0.028	0.84	11.66	2.28
2014	March	Summer	Salto Santiago	S1	30	49.4	7	23.8	5.2	6.2	1.4	0.028	0.588	0.17	2.73
2014	March	Summer	Salto Santiago	S2	52	49.2	7.9	24.7	7.1	0	1.8	0.024	0.532	17	6.37
2014	March	Summer	Salto Santiago	S3	59	47.8	7	25.1	6.5	0	2.5	0.028	0.588	11.66	1.82
2014	March	Summer	Salto Santiago	S4	7.5	46.5	7.2	22.4	5.3	0	2.5	0.028	0.504	13.33	3.19
2014	March	Summer	Salto Osório	S5	25	65.9	7.9	23.2	5.2	11.2	0.7	0.025	0.56	63.33	3.19
2014	March	Summer	Salto Osório	S6	36	58.8	7	24.4	4.4	4.3	1.9	0.018	0.462	0.66	3.64
2014	March	Summer	Salto Osório	S7	41	60.1	7.4	25.3	4.7	0	4.1	0.019	0.392	18.33	0.46
2014	March	Summer	Salto Osório	S8	5.5	50.9	7.3	24.6	7.1	0	3.5	0.026	0.322	11.66	0.27
2014	May	Winter	Salto Santiago	S1	41	34.6	6.7	19.7	6.3	5.7	1.4	0.013	0.014	4	0.55
2014	May	Winter	Salto Santiago	S2	69	36	6.6	20.6	6	3.4	2.4	0.011	0.056	2.4	1.09
2014	May	Winter	Salto Santiago	S3	71	35.4	6.8	20.7	5.8	3.2	2.8	0.013	0.21	1.8	1.64
2014	May	Winter	Salto Santiago	S4	8.1	35.3	6.9	20.8	6	3.1	2.6	0.011	0.196	3.4	6.01
2014	May	Winter	Salto Osório	S5	34	37.6	6.7	20.9	5.9	4.3	2.1	0.008	0.504	4.8	0.55
2014	May	Winter	Salto Osório	S6	34	37.1	6.7	20.9	6	2.6	2.7	0.012	0.378	2.2	1.09
2014	May	Winter	Salto Osório	S7	41	38.9	6.6	21.2	6	2.5	2.6	0.011	0.672	1	1.09
2014	May	Winter	Salto Osório	S8	6.3	38.6	6.6	21.3	6.3	2.2	3.9	0.01	0.518	0.8	1.09
2014	July	Winter	Salto Santiago	S1	56	25.4	6.5	17.4	6.4	33.7	0.5	0.051	1.83	10.2	1.09
2014	July	Winter	Salto Santiago	S2	71	26	6.2	18.6	7.1	44.9	0.4	0.065	2.01	9.2	0.55
2014	July	Winter	Salto Santiago	S3	72	28.2	6.7	18.9	8.4	34.9	0.5	0.044	0.35	9	0.55
2014	July	Winter	Salto Santiago	S4	8.2	25.2	6.7	17.8	6.8	48.7	0.5	0.072	1.78	11.2	0.55
2014	July	Winter	Salto Osório	S5	34	27.9	6.5	17.3	8.5	49.9	0.4	0.148	1.10	13.4	0.55
2014	July	Winter	Salto Osório	S6	35	27.6	6.6	17.9	8.5	44.5	0.5	0.171	0.784	7.6	0.55
2014	July	Winter	Salto Osório	S7	36	28.7	6.6	18.5	8.1	41.9	0.5	0.046	1.37	8.2	0.27
2014	July	Winter	Salto Osório	S8	6.1	29.3	6.5	17.7	8.4	40.9	0.5	0.17	1.27	10.2	2.18
2014	September	Winter	Salto Santiago	S1	44	26.6	5.4	18.7	7.7	20.7	0.8	0.135	0.924	4.8	1.09
2014	September	Winter	Salto Santiago	S2	71	24.1	7.8	21.2	8.8	19.7	0.9	0.167	0.91	5.4	1.64
2014	September	Winter	Salto Santiago	S3	74	23.4	5.5	19.7	8.6	21.2	0.7	0.151	0.882	3	0.27
2014	September	Winter	Salto Santiago	S4	8.6	22.9	5.4	17.5	7	26.2	0.7	0.149	0.882	16.8	0.55
2014	September	Winter	Salto Osório	S5	31	25	6.3	17.4	6.9	29	0.7	0.077	1.26	1.6	0.27
2014	September	Winter	Salto Osório	S6	36	22.5	6.2	18.5	7.1	27.3	0.6	0.05	1.05	1.6	2.18
2014	September	Winter	Salto Osório	S7	33	24.8	5.4	20	7.1	29.8	0.7	0.051	1.10	3.6	2.73
2014	September	Winter	Salto Osório	S8	6.6	25.4	5.4	18.3	7	30.2	0.7	0.058	1.07	3.2	0.55
2014	November	Summer	Salto Santiago	S1	30	44	5.9	23.9	5.8	15.5	0.8	0.161	0.084	1.4	0.55
2014	November	Summer	Salto Santiago	S2	60	42	6.7	26.2	6.5	7.5	1.5	0.17	0.392	10.2	1.09
2014	November	Summer	Salto Santiago	S3	64	42	7.6	27.4	6	6.8	0.1	0.166	0.504	2	0.55
2014	November	Summer	Salto Santiago	S4	7.2	46	6.3	20.5	6.1	12.9	1	0.161	0.532	2.2	0.55
2014	November	Summer	Salto Osório	S5	33	44	6.2	15	6.6	14	0.9	0.113	0.574	3.2	0.55
2014	November	Summer	Salto Osório	S6	31	43	6.8	21.2	6	12.7	1.1	0.109	1.21	0.8	0.55
2014	November	Summer	Salto Osório	S7	35.5	42	7	23.2	6.2	12.4	1.1	0.114	0.84	1.2	0.55
2014	November	Summer	Salto Osório	S8	5.2	42	6.7	21.4	6	11	1.3	0.11	0.504	0.8	0.55
2015	January	Summer	Salto Santiago	S1	31	62	5.1	25.4	7.8	13.1	1	0.0447	0.784	2	1.09
2015	January	Summer	Salto Santiago	S2	62	52	8.1	28.6	8.9	6	1.6	0.0355	0.896	1.2	0.27
2015	January	Summer	Salto Santiago	S3	66	54	5.8	27	8.6	2.9	2	0.0288	0.924	1.4	0.27
2015	January	Summer	Salto Santiago	S4	7.5	28.9	6.3	24.3	8.3	6.7	2	0.0161	0.6382	4.2	0.27
2015	January	Summer	Salto Osório	S5	36	54	7.4	24.6	8.7	4	1.8	0.0197	1.06	6	1.09
2015	January	Summer	Salto Osório	S6	36	30.6	6.9	25.6	8.4	7	2.2	0.0247	0.644	1.4	0.27
2015	January	Summer	Salto Osório	S7	40	50	7.2	27.1	8.1	3.5	3	0.023	0.546	2.8	0.27
2015	January	Summer	Salto Osório	S8	6	28.1	6.2	24.5	7.6	3	2.1	0.0247	0.812	1.2	1.09
2015	March	Summer	Salto Santiago	S1	27	37.5	6.9	24.3	5.3	6.7	1.6	0.0272	1.33	1	0.8
2015	March	Summer	Salto Santiago	S2	60	34.4	7	27.3	7.4	4.6	2	0.0263	0.63	1.2	0.6
2015	March	Summer	Salto Santiago	S3	63	36.9	5.7	27.2	7.8	3.1	2.5	0.013	0.616	1.2	0.55
2015	March	Summer	Salto Santiago	S4	7.3	36.9	6.1	24.9	7.6	4	2.5	0.0147	1.01	1.6	0.27
2015	March	Summer	Salto Osório	S5	43	37.7	7.6	24.9	7.4	4.5	2	0.0272	0.322	1.8	1.09
2015	March	Summer	Salto Osório	S6	34	36.8	7.5	26.1	7.4	3.8	2.5	0.038	0.238	0.4	1.09
2015	March	Summer	Salto Osório	S7	39	37.3	7.5	28.8	7.6	4.7	3.7	0.0305	0.336	1.4	0.27
2015	March	Summer	Salto Osório	S8	5.3	33.1	6.8	25.5	5.5	5.6	3.5	0.028	0.77	1.8	0.55
2015	May	Winter	Salto Santiago	S1	36	33	5.9	21.2	6.3	4.8	1.8	0.038	1.33	3	0.55
2015	May	Winter	Salto Santiago	S2	38	35.4	6.2	22.6	7.1	4.3	2.4	0.0297	0.63	3.2	0.27
2015	May	Winter	Salto Santiago	S3	56	42	6.5	21.9	5.2	2.7	3.8	0.0405	0.616	3.6	0.55
2015	May	Winter	Salto Santiago	S4	7.1	36.7	6.4	21.9	10.9	2.6	2.8	0.0247	1.01	2.8	0.4
2015	May	Winter	Salto Osório	S5	32	37.5	7.1	21.9	12.2	11.5	1.6	0.0413	0.322	4.2	0.6
2015	May	Winter	Salto Osório	S6	33	35.5	7.3	22.3	12.7	2.9	2	0.0205	0.238	2.8	0.27
2015	May	Winter	Salto Osório	S7	41	34.5	6.3	22.6	9.1	2.2	3.2	0.0105	0.336	3	1.64
2015	May	Winter	Salto Osório	S8	5.1	31.4	5.9	20	5.8	2.8	3	0.0205	0.77	4.2	3.28
2015	July	Winter	Salto Santiago	S1	38	42	10.2	16.9	9.8	18.6	0.8	0.0405	0.434	4.4	0.55
2015	July	Winter	Salto Santiago	S2	58	43	6.5	18.3	9.9	2.2	1.8	0.028	0.616	3.8	0.27
2015	July	Winter	Salto Santiago	S3	75	36.1	6.3	18.4	8.2	3.8	2.2	0.038	0.504	0.4	0.27
2015	July	Winter	Salto Santiago	S4	8.8	26.7	6.1	18	9.5	7.5	1.5	0.0255	0.672	1.2	0.27
2015	July	Winter	Salto Osório	S5	22	46	6.3	18	9.9	4.1	1.4	0.0238	0.392	0.8	0.55
2015	July	Winter	Salto Osório	S6	48	40	6.3	18.2	8.6	4.8	1.8	0.0238	0.378	0	0.27
2015	July	Winter	Salto Osório	S7	41	59	6.3	18.5	8.8	4.9	1.8	0.0238	0.364	0.2	0.55
2015	July	Winter	Salto Osório	S8	6.6	28.1	5.6	18.4	11.2	6.3	1.4	0.0213	0.392	0.8	0.27
2015	September	Winter	Salto Santiago	S1	44	40	6	20.5	8.9	10.9	1.4	0.0272	0.406	1.2	9.83
2015	September	Winter	Salto Santiago	S2	68	52	9.2	24.3	8.4	1.8	2.3	0.0272	0.854	1	1.09
2015	September	Winter	Salto Santiago	S3	72	58	8	23.6	6.8	218.1	2.7	0.023	0.658	1.6	0.55
2015	September	Winter	Salto Santiago	S4	8	46	6.9	19.4	10.2	7.6	2	0.0188	0.518	1	0.27
2015	September	Winter	Salto Osório	S5	38	45	6.3	18.8	9.8	110	2	0.0338	0.546	1.6	0.27
2015	September	Winter	Salto Osório	S6	33	47	6.1	20.8	9.2	59.1	2.3	0.0197	0.602	0.6	3.28
2015	September	Winter	Salto Osório	S7	45	53	5.8	21.7	9.5	49.3	2	0.0213	0.364	0.6	0.27
2015	September	Winter	Salto Osório	S8	6.2	30	6.1	18.9	9.2	5	2.7	0.0205	0.812	1.6	0.27
2015	November	Summer	Salto Santiago	S1	39	30.4	6.5	21.1	7.6	15	1.2	0.0497	1.13	0.4	2
2015	November	Summer	Salto Santiago	S2	71	35.1	6.6	9.5	9.5	8.1	2.1	0.038	1.30	4.2	1.64
2015	November	Summer	Salto Santiago	S3	74	29.2	6.4	24.4	5	8.3	1.7	0.0288	1.15	14.6	2.73
2015	November	Summer	Salto Santiago	S4	8.7	37.4	6.3	21.1	9.5	9.9	1.7	0.028	1.63	5	1
2015	November	Summer	Salto Osório	S5	38	37.2	6.6	21.2	7.5	11.2	1.7	0.033	1.31	0.6	3
2015	November	Summer	Salto Osório	S6	36	36.2	6.2	21.5	6.4	7.4	1.7	0.0388	1.26	1.4	1.6
2015	November	Summer	Salto Osório	S7	42	34.4	6.9	23.5	7.7	7.6	2.2	0.0288	1.33	0.6	3.28
2015	November	Summer	Salto Osório	S8	6.8	38	6.4	21	10.1	7.9	1.9	0.0447	0.756	0.8	1.2
2016	January	Summer	Salto Santiago	S1	38	30.5	6.7	25.4	8.5	11.9	1.1	0.033	0.742	3.4	0.55
2016	January	Summer	Salto Santiago	S2	71	29.1	5.7	28.2	8	2.4	2	0.0205	0.308	7.6	0.4
2016	January	Summer	Salto Santiago	S3	74	21.9	6.5	27.7	8.7	9.3	1.7	0.0205	0.294	0.8	0.55
2016	January	Summer	Salto Santiago	S4	8.6	29	6.6	23.9	8.8	7.7	1.6	0.023	0.21	0.6	1.64
2016	January	Summer	Salto Osório	S5	31.5	30.6	6.6	24.7	9	7	1.5	0.0188	0.322	1.8	1.09
2016	January	Summer	Salto Osório	S6	37	30.4	6.6	25.5	9.8	8	1.6	0.0255	0.322	1.6	2
2016	January	Summer	Salto Osório	S7	43	30.7	6.5	27.2	7.8	5.2	1.6	0.0172	0.168	0.8	0.3
2016	January	Summer	Salto Osório	S8	6.4	30.9	6.1	22.4	9	5.4	2.2	0.013	0.448	1.4	6.01
2016	March	Summer	Salto Santiago	S1	46	33.1	6.8	27.5	9.3	5.6	1.6	0.028	0.504	1.2	3
2016	March	Summer	Salto Santiago	S2	76	30.8	7.8	26.4	8.3	2.7	2.9	0.0522	0.476	3.6	2
2016	March	Summer	Salto Santiago	S3	71	28.8	7.4	29.7	8.1	2.6	2.6	0.018	0.336	2.4	0.55
2016	March	Summer	Salto Santiago	S4	8	31.4	6.8	24.3	8.6	4.5	2.2	0.0197	0.462	1.8	0.27
2016	March	Summer	Salto Osório	S5	39	25.3	6.1	24.7	7.9	5.5	2.4	0.0247	1.26	2.2	2
2016	March	Summer	Salto Osório	S6	39.5	31.1	7.5	27	8.2	3.6	2.5	0.0197	1.19	1.2	1
2016	March	Summer	Salto Osório	S7	44	25.4	7.6	28	9.4	4.1	2.6	0.0205	1.29	0.4	0.27
2016	March	Summer	Salto Osório	S8	5.9	35.5	6.5	25	7.2	1.5	3.6	0.018	1.39	1.8	0.55
2016	May	Winter	Salto Santiago	S1	36	35.1	7.1	21.8	6.5	5.3	1.8	0.0222	0.98	1.2	0.55
2016	May	Winter	Salto Santiago	S2	66	35.7	6.3	22.7	6.9	3.5	2.6	0.0205	0.756	1.8	1.09
2016	May	Winter	Salto Santiago	S3	71	35.6	6.3	22.6	6.1	2.1	2.9	0.0155	0.952	1.2	0.27
2016	May	Winter	Salto Santiago	S4	8	43.3	6.4	21.6	5.6	1.8	3	0.0147	0.77	1	1.09
2016	May	Winter	Salto Osório	S5	36	32.1	6.3	21.5	5.7	2.2	1.9	0.018	0.728	0.8	1.09
2016	May	Winter	Salto Osório	S6	37	30.4	6.7	22.8	5.8	2.8	3.1	0.0163	1.03	0.6	0.55
2016	May	Winter	Salto Osório	S7	43	32.8	6.3	22.6	5.7	2.9	2.6	0.0255	0.336	1.2	0.55
2016	May	Winter	Salto Osório	S8	6	33.2	6.2	21.5	6.6	1	4.6	0.0163	0.364	0.6	0.55
2016	July	Winter	Salto Santiago	S1	46	31.2	6.6	18.8	9	4	2	0.0255	0.728	4.2	4.37
2016	July	Winter	Salto Santiago	S2	61	32.2	6.8	19.3	8	2.9	3.5	0.0105	0.35	0.4	3
2016	July	Winter	Salto Santiago	S3	76	34.1	6.8	17.5	6.8	4.3	4.1	0.0163	0.63	0.6	0.55
2016	July	Winter	Salto Santiago	S4	8.7	31.3	7.7	17.5	9.6	4.3	3	0.013	0.462	0.6	0.27
2016	July	Winter	Salto Osório	S5	36	42.4	7	17.2	8.1	4.6	2.6	0.0238	1.06	1	1.64
2016	July	Winter	Salto Osório	S6	37	42.4	6.7	19.4	7.2	17.8	1.1	0.0288	0.994	11.8	0.55
2016	July	Winter	Salto Osório	S7	43	34.7	7	17.4	7.2	4.7	3.8	0.0147	0.434	1	0.55
2016	July	Winter	Salto Osório	S8	6.6	40.9	6.7	17.4	6.6	5.2	4.2	0.0172	0.182	1.8	0.4
2016	September	Winter	Salto Santiago	S1	46	30.4	8.9	20.7	8.4	6.6	1.9	0.0338	1.49	2	1.64
2016	September	Winter	Salto Santiago	S2	66	30.4	8.6	20.3	10.3	1.4	4.1	0.0138	1.86	0.4	0.9
2016	September	Winter	Salto Santiago	S3	71	29.2	7.4	18.9	9.1	1.9	3.4	0.0155	1.44	0.6	0.8
2016	September	Winter	Salto Santiago	S4	8	30.3	7.6	17.1	7.3	4.4	2.8	0.0147	1.93	1.2	2.18
2016	September	Winter	Salto Osório	S5	32	38.8	7.5	17.2	8.9	3.4	2.7	0.0197	1.37	2	1
2016	September	Winter	Salto Osório	S6	35	31.5	7	19.8	8	2.8	2.9	0.0222	1.55	0.8	1.09
2016	September	Winter	Salto Osório	S7	41	38.3	7.1	19.1	9.6	2.7	2.8	0.0197	1.60	0.6	1
2016	September	Winter	Salto Osório	S8	6	38.9	8.1	17.4	7.5	4.2	3.1	0.018	1.58	1.2	1.09
2016	November	Summer	Salto Santiago	S1	36	30.9	6.8	22.8	8.6	2.5	1.9	0.0213	0.7	1	1.09
2016	November	Summer	Salto Santiago	S2	66	36.5	6.6	26.3	8.5	3	2.6	0.0197	0.84	0.8	1.09
2016	November	Summer	Salto Santiago	S3	72	35.4	7.6	26.9	7.2	1.6	2.6	0.0147	0.7	1.4	0.55
2016	November	Summer	Salto Santiago	S4	8.1	33.2	6.7	18.9	6.9	2.5	2	0.0113	0.56	2	1.09
2016	November	Summer	Salto Osório	S5	46	37	7.4	21.1	11.5	1.8	2.4	0.0222	0.7	0.4	0.8
2016	November	Summer	Salto Osório	S6	31	33.8	6.7	26.1	7.1	1.8	2.9	0.0222	0.7	0.4	0.55
2016	November	Summer	Salto Osório	S7	43	31.5	5.5	26.2	8.5	2.4	2.8	0.0172	0.7	30	0.55
2016	November	Summer	Salto Osório	S8	6.2	35	6.5	21.5	5.9	2.4	4.6	0.023	0.7	2	1.64
2017	January	Summer	Salto Santiago	S1	40	41.9	6.6	25.3	6.6	7.9	1.8	0.033	0.42	3.8	3.82
2017	January	Summer	Salto Santiago	S2	67	36.8	6.9	29.1	8	0.8	2.8	0.0172	0.182	0	1.09
2017	January	Summer	Salto Santiago	S3	68	35.8	7.3	29.4	8.5	1.3	2.3	0.0155	0.07	3.2	1.64
2017	January	Summer	Salto Santiago	S4	7.9	40.2	6.8	22.5	9.5	4.2	2.8	0.0147	0.154	129.4	1
2017	January	Summer	Salto Osório	S5	21	37	6.4	23.4	7.7	3	3.1	0.0322	0.966	0.8	0.55
2017	January	Summer	Salto Osório	S6	36	38.2	7	29.6	7.8	1.4	2.7	0.0255	0.77	5.8	0.9
2017	January	Summer	Salto Osório	S7	41	34.9	7	28.4	6.9	3.2	3.3	0.0088	0.812	0.4	0.5
2017	January	Summer	Salto Osório	S8	5.9	39.3	6.4	23.3	6.4	2.7	3.2	0.0097	0.602	2	0.9
2017	March	Summer	Salto Santiago	S1	34	38.8	6.4	27	6.4	10.1	1.3	0.0263	1.75	1.6	4.37
2017	March	Summer	Salto Santiago	S2	50	39.2	8.7	27.8	7.5	5.1	1.7	0.0272	1.51	1.6	1.09
2017	March	Summer	Salto Santiago	S3	56	40	6.6	26.8	6.8	2	2.7	0.0197	0.896	1.6	2.18
2017	March	Summer	Salto Santiago	S4	7.3	31.4	5.8	25.2	4.4	4.5	2	0.0255	0.952	1.6	0.9
2017	March	Summer	Salto Osório	S5	38	37.3	6.3	25.2	4.6	3.6	2.1	0.0213	0.994	2.2	0.55
2017	March	Summer	Salto Osório	S6	46	33.3	6.4	25.6	5.7	6.3	2.2	0.0205	0.616	3.2	1.09
2017	March	Summer	Salto Osório	S7	43	38.6	6.5	26.9	6.4	2.9	3.8	0.018	1.01	1	0.55
2017	March	Summer	Salto Osório	S8	5.4	39.1	6.5	25.2	4.9	3	3.8	0.0147	1.52	1.8	1.09
2017	May	Winter	Salto Santiago	S1	34	36.5	5.8	22.7	6.6	8.1	1.8	0.0172	0.238	3.2	0.55
2017	May	Winter	Salto Santiago	S2	53	38.4	6.6	24.2	5.7	7.1	2.6	0.0222	0.364	2.2	0.5
2017	May	Winter	Salto Santiago	S3	56	37.9	7.1	23	6.6	2.8	2.4	0.0238	0.56	0.6	1.09
2017	May	Winter	Salto Santiago	S4	7.2	38.1	6.5	22.8	9.1	5	3.6	0.0238	0.168	0.6	0.8
2017	May	Winter	Salto Osório	S5	39	39.1	6.6	21	6.5	3.7	3	0.0163	0.21	1.2	1.09
2017	May	Winter	Salto Osório	S6	35	41	6.5	22.6	7.1	3.8	2.7	0.0188	0.518	1.4	3.28
2017	May	Winter	Salto Osório	S7	42	41.5	5.7	23.3	6.4	4.2	3.1	0.0163	0.336	0.4	1.64
2017	May	Winter	Salto Osório	S8	5.2	40.2	6.8	22.7	6.4	2	3.3	0.0305	0.42	1	0.55
2017	July	Winter	Salto Santiago	S1	37	32.7	6.9	17.9	7.6	12.1	1.9	0.0263	0.448	1	1
2017	July	Winter	Salto Santiago	S2	66	33.9	7.2	19	7.5	6.5	2.2	0.0188	0.91	1.4	0.53
2017	July	Winter	Salto Santiago	S3	75	38	6.9	19	6.3	4.5	3.3	0.0222	0.462	1	1.6
2017	July	Winter	Salto Santiago	S4	8.8	35.9	7.4	18.1	12.8	5	2.4	0.0163	0.504	0.8	1
2017	July	Winter	Salto Osório	S5	32	34.5	7.1	19	7	7.6	3.1	0.0288	0.014	0.8	2.67
2017	July	Winter	Salto Osório	S6	36	34.5	6.8	19	8	7.2	2.8	0.018	0.35	3.5	1
2017	July	Winter	Salto Osório	S7	42	34.5	7.2	19.3	6.9	5.7	3.2	0.0205	0.546	0.6	1
2017	July	Winter	Salto Osório	S8	6.7	36.5	7.1	19.1	8.7	4	3.8	0.0205	0.826	0.8	0.53
2017	September	Winter	Salto Santiago	S1	36	36.3	6.8	21.9	9.3	4.9	2.1	0.0897	0.98	2.3	0.53
2017	September	Winter	Salto Santiago	S2	66	38.7	7.9	26.3	8.5	1.7	3.1	0.0697	0.392	0.2	0.27
2017	September	Winter	Salto Santiago	S3	62	38.2	7.6	22.3	7.4	2	4.8	0.0763	1.4	0.9	0.53
2017	September	Winter	Salto Santiago	S4	7.3	34.8	6.9	18.6	7.3	2.9	3.3	0.0513	0.616	0.3	1.34
2017	September	Winter	Salto Osório	S5	32	35.2	7.8	19.3	6.9	3.5	2.7	0.0397	0.252	1.6	0.27
2017	September	Winter	Salto Osório	S6	35	34.9	7.5	22.4	7.4	2.4	2.7	0.0547	0.14	0.6	0.27
2017	September	Winter	Salto Osório	S7	43	35.6	7.4	22.1	7.4	4.1	3.2	0.043	0.588	0.2	0.53
2017	September	Winter	Salto Osório	S8	5.5	32.9	7.9	19.1	6.8	2.4	4.2	0.0463	0	0.3	0.27
2017	November	Summer	Salto Santiago	S1	28	36	6.7	21	7.4	10.4	0.9	0.053	0.196	2.7	0.8
2017	November	Summer	Salto Santiago	S2	50	39	6.3	24.1	7.9	5.4	2.1	0.043	0.392	0.9	1.34
2017	November	Summer	Salto Santiago	S3	63	40.5	7.8	22.4	8.2	4	2.7	0.1197	0.588	10.6	3.74
2017	November	Summer	Salto Santiago	S4	7.3	39.2	7.5	19.9	6.2	2.2	2.4	0.023	0.28	0.7	0.8
2017	November	Summer	Salto Osório	S5	36	35.6	7.8	21.1	7	7.7	2	0.1313	1.60	2.2	1.6
2017	November	Summer	Salto Osório	S6	36	34.7	7.3	23.8	7.6	27.2	0.9	0.1363	0.56	5.9	3.47
2017	November	Summer	Salto Osório	S7	41	42.9	7.9	27	8.4	9.6	1.7	0.133	1.17	1	0.53
2017	November	Summer	Salto Osório	S8	5.3	42.9	7.2	22.6	6.9	14.1	1.3	0.1213	0.728	1	0.53
2018	January	Summer	Salto Santiago	S1	34	42.3	5.9	31.4	4.9	12.2	1.7	0.001	0.95	3.4	2.03
2018	January	Summer	Salto Santiago	S2	69	39.8	8.3	26.2	4.3	10.2	2	0.002	0.45	3.3	12.28
2018	January	Summer	Salto Santiago	S3	70	42.4	7.5	26.9	6.4	4.9	2.6	0.001	0.92	3	4.33
2018	January	Summer	Salto Santiago	S4	7.9	42.1	6.4	23.9	6	8.5	2.4	0.0025	0.5	3.4	3.04
2018	January	Summer	Salto Osório	S5	31	43.8	6.8	23.8	5.8	8.8	2.3	0.001	0.53	3.2	0.96
2018	January	Summer	Salto Osório	S6	36	43.4	6.5	25.7	7.2	8	2.2	0.001	0.73	3.4	3.84
2018	January	Summer	Salto Osório	S7	42.5	44.9	7.3	27.5	7.2	3.3	3.3	0.001	0.84	3.1	1.92
2018	January	Summer	Salto Osório	S8	5.9	45	6.6	24.5	6.1	6.6	3	0.001	0.7	3.4	0.96
2018	March	Summer	Salto Santiago	S1	33	41.7	7	21.8	7.2	15.9	1.6	0.016	0.53	3.4	4.81
2018	March	Summer	Salto Santiago	S2	64	43.2	8.2	16.9	9.5	0.9	1.8	0.045	0.22	3.33	6.73
2018	March	Summer	Salto Santiago	S3	56	45.8	7.9	23.4	8	3.1	3.3	0.005	1.43	3.1	9.61
2018	March	Summer	Salto Santiago	S4	7.3	40.5	7.9	23.4	7.8	4.5	3.3	0.011	1.37	3.4	0.53
2018	March	Summer	Salto Osório	S5	29	41.4	6.5	24.5	5	6.2	1.2	0.015	1.29	2.9	0.53
2018	March	Summer	Salto Osório	S6	32	41.4	8.1	24.6	5.6	2.7	2.8	0.011	0.7	3.4	1.82
2018	March	Summer	Salto Osório	S7	39	39.6	8.4	25.6	7.2	2.1	3.4	0.009	0.73	3.4	2.72
2018	March	Summer	Salto Osório	S8	5.4	40.7	7.5	23.1	3.7	6.8	3.6	0.007	0.73	3.4	0.53
2018	May	Winter	Salto Santiago	S1	39	42.3	6.2	21.8	5.9	5	2	0.015	0.9	3.4	2.88
2018	May	Winter	Salto Santiago	S2	59	38.2	7.1	22.2	5.6	2.8	4.1	0.007	0.73	3.2	0.56
2018	May	Winter	Salto Santiago	S3	66.4	38.3	7.7	23.4	6.1	2.4	3.5	0.009	1.23	3.4	2.72
2018	May	Winter	Salto Santiago	S4	7.2	38.5	7.7	20.9	6.1	1.2	5	0.013	0.95	3.4	1.01
2018	May	Winter	Salto Osório	S5	43	40.3	7.9	22.1	5.2	2.6	4.1	0.013	1.12	3	0.96
2018	May	Winter	Salto Osório	S6	35.3	45.3	7.4	21.9	5.7	2.2	4	0.017	0.87	3.4	0.56
2018	May	Winter	Salto Osório	S7	42	45.4	7.6	22.4	6.2	3.2	3	0.015	0.95	3.1	1.82
2018	May	Winter	Salto Osório	S8	5.2	46.1	6.8	21.3	10.4	1.6	4.8	0.013	0.67	3.4	1.92
