# Supplementary material for: A long-term study on zooplankton in two contrasting cascade reservoirs (Iguaçu River, Brazil): effects of inter-annual, seasonal, and environmental factors
Source: PeerJ. 2020 May 5;8:e8979. doi: 10.7717/peerj.8979 (PMC7207214; doi:10.7717/peerj.8979)
Supplement: Data S2 [file peerj-08-8979-s002.xlsx]

## Sheet: Abundance (ind m-3)
Year	2003	2003	2003	2003	2003	2003	2003	2003	2003	2003	2003	2003	2003	2003	2003	2003	2003	2003	2003	2003	2003	2003	2003	2003	2004	2004	2004	2004	2004	2004	2004	2004	2004	2004	2004	2004	2004	2004	2004	2004	2004	2004	2004	2004	2004	2004	2004	2004	2004
Month	July	July	July	July	July	July	July	July	September	September	September	September	September	September	September	September	November	November	November	November	November	November	November	November	January	January	January	January	January	January	January	January	March	March	March	March	March	March	March	March	May	May	May	May	May	May	May	May	July
Period	Winter	Winter	Winter	Winter	Winter	Winter	Winter	Winter	Winter	Winter	Winter	Winter	Winter	Winter	Winter	Winter	Summer	Summer	Summer	Summer	Summer	Summer	Summer	Summer	Summer	Summer	Summer	Summer	Summer	Summer	Summer	Summer	Summer	Summer	Summer	Summer	Summer	Summer	Summer	Summer	Winter	Winter	Winter	Winter	Winter	Winter	Winter	Winter	Winter
Reservoir	Salto Santiago	Salto Santiago	Salto Santiago	Salto Santiago	Salto Osório	Salto Osório	Salto Osório	Salto Osório	Salto Santiago	Salto Santiago	Salto Santiago	Salto Santiago	Salto Osório	Salto Osório	Salto Osório	Salto Osório	Salto Santiago	Salto Santiago	Salto Santiago	Salto Santiago	Salto Osório	Salto Osório	Salto Osório	Salto Osório	Salto Santiago	Salto Santiago	Salto Santiago	Salto Santiago	Salto Osório	Salto Osório	Salto Osório	Salto Osório	Salto Santiago	Salto Santiago	Salto Santiago	Salto Santiago	Salto Osório	Salto Osório	Salto Osório	Salto Osório	Salto Santiago	Salto Santiago	Salto Santiago	Salto Santiago	Salto Osório	Salto Osório	Salto Osório	Salto Osório	Salto Santiago
Site	S1	S2	S3	S4	S5	S6	S7	S8	S1	S2	S3	S4	S5	S6	S7	S8	S1	S2	S3	S4	S5	S6	S7	S8	S1	S2	S3	S4	S5	S6	S7	S8	S1	S2	S3	S4	S5	S6	S7	S8	S1	S2	S3	S4	S5	S6	S7	S8	S1
Asplanchna sieboldii	0	4662	0	0	0	0	14610.4	0	0	0	2759.74	1010.1	0	710.227	1913.88	1939.39	0	0	0	0	0	0	0	0	0	0	0	0	0	0	0	0	0	0	0	0	0	0	0	0	0	757.576	0	0	0	0	0	0	0
Asplanchnopus sp.	0	0	0	0	0	0	0	0	0	0	0	0	0	0	0	2181.82	0	0	0	0	0	0	0	0	0	0	0	0	0	0	0	0	0	0	0	0	0	0	0	0	0	0	0	0	0	0	0	0	0
Anuraeopsis navicula	0	0	0	0	0	0	0	0	0	0	0	0	0	0	0	0	0	0	0	0	0	0	0	0	0	0	0	0	0	0	0	0	0	0	0	0	0	0	0	0	0	0	0	0	0	0	0	0	0
Brachionus angularis	0	0	0	0	0	0	0	0	0	0	0	0	0	0	0	0	0	0	0	0	0	0	0	0	0	0	0	0	0	0	0	0	0	0	0	0	0	0	0	0	0	0	0	0	0	0	0	0	0
Brachionus calyciflorus	0	0	0	0	0	0	0	0	6818.18	0	0	0	0	0	478.469	0	0	0	0	0	0	0	0	0	0	0	0	0	0	0	0	0	0	0	0	0	0	0	0	18181.8	0	0	0	0	0	0	0	0	0
Brachionus caudatus	0	0	0	0	0	0	0	0	0	0	0	0	0	0	0	0	0	0	0	0	662.879	0	0	0	0	0	0	0	0	0	0	0	0	0	0	0	0	0	0	0	0	0	0	0	0	0	0	0	0
Brachionus dolabratus	0	0	0	0	0	0	0	0	0	0	0	0	0	0	0	0	0	0	0	0	0	0	0	0	0	0	0	0	0	0	0	0	0	0	0	0	0	0	0	0	0	0	0	0	0	0	0	0	0
Brachionus falcatus	0	0	0	0	0	0	0	0	0	0	0	0	0	0	0	0	0	0	0	0	0	0	0	0	0	0	0	0	0	0	0	0	0	0	0	0	0	0	0	0	0	0	0	0	0	0	0	0	0
Brachionus forficula	0	0	0	0	0	0	0	0	0	0	0	0	0	0	0	0	0	0	0	0	0	0	0	0	0	0	0	0	0	0	0	0	0	0	0	0	0	0	0	0	0	0	0	0	0	0	0	0	0
Brachionus mirus	0	0	0	0	0	0	0	0	0	0	0	0	0	0	0	0	0	0	0	0	0	0	0	0	0	0	0	0	0	0	0	0	0	1558.44	6628.79	1090.91	27272.7	9917.36	2331	0	0	0	0	0	0	0	0	0	0
Brachionus quadridentatus	0	0	0	0	0	0	0	0	0	0	0	0	0	0	0	0	0	0	0	0	0	0	0	0	0	0	0	0	0	0	0	0	0	0	0	0	0	0	0	0	0	0	0	0	0	0	0	0	0
Kellicottia bostoniensis	159.091	4079.25	582.751	320.856	0	4040.4	3246.75	389.61	20454.5	34090.9	0	505.051	4848.48	2130.68	4784.69	2181.82	0	3409.09	946.97	802.139	11931.8	1748.25	4419.19	495.868	1515.15	0	0	0	473.485	0	0	2272.73	2727.27	194.805	0	0	0	0	0	0	3535.35	0	5311	11515.2	9523.81	6060.61	0	0	194.805
Keratella americana	159.091	0	0	0	0	0	0	0	0	0	0	0	0	0	0	0	0	0	0	0	0	0	0	0	0	0	0	0	0	0	0	0	0	0	0	0	0	0	0	0	0	0	0	0	0	0	0	0	0
Keratella cochlearis	0	4079.25	291.375	0	101.01	3535.35	4329	194.805	102273	27272.7	919.913	1010.1	1818.18	710.227	956.938	727.273	0	0	0	0	0	0	441.919	0	0	0	0	0	473.485	0	0	0	495.868	194.805	0	0	0	0	0	0	0	0	0	151.515	0	0	0	0	0
Keratella lenzi	0	0	0	0	0	0	0	0	0	0	0	0	0	0	0	0	0	0	0	0	0	0	0	0	0	0	0	0	0	0	0	0	0	0	0	0	0	0	0	0	0	0	0	0	0	0	0	0	0
Keratella tropica	0	0	0	0	0	0	0	0	0	0	0	0	0	0	0	0	0	0	0	0	0	0	0	0	0	0	0	0	0	0	0	0	0	0	0	0	0	0	0	0	0	0	0	0	0	0	0	0	0
Plationus patulus	0	0	0	0	0	0	0	0	0	0	0	0	0	0	0	0	0	0	0	0	0	0	0	0	0	0	0	0	0	0	0	0	0	0	0	0	0	0	0	0	0	0	0	0	0	0	0	0	0
Platyias quadricornis	0	0	0	0	0	0	0	0	0	0	0	0	0	0	0	0	0	0	0	0	0	0	0	0	0	0	0	0	0	0	0	0	0	389.61	0	0	2272.73	0	0	0	0	0	0	0	0	0	0	0	0
Collotheca sp.	0	0	0	0	0	1010.1	14610.4	0	0	0	0	0	0	0	0	0	0	0	0	0	0	0	0	0	0	0	0	0	0	0	0	0	0	0	0	0	0	0	0	0	0	0	0	0	0	0	0	0	0
Stephanoceros fimbriatus	0	0	0	0	0	0	0	0	0	0	0	0	0	0	0	0	0	0	0	0	0	0	0	0	0	0	0	0	0	0	0	0	0	0	0	0	0	0	0	0	0	0	0	0	0	0	0	0	0
Conochilus sp.	10977.3	3496.5	9615.38	962.567	909.091	4040.4	8116.88	0	56818.2	56818.2	85551.9	3535.35	6060.61	12073.9	5741.63	969.697	0	19886.4	10890.2	641.711	11931.8	42540.8	11048	247.934	18181.8	98395.7	5347.59	10101	6155.3	267.38	64772.7	75000	1239.67	194.805	946.97	1363.64	0	3305.79	1165.5	1010.1	3535.35	0	717.703	0	0	0	0	0	194.805
Epiphanes clavatula	0	12237.8	291.375	0	0	1010.1	20562.8	194.805	0	0	0	3282.83	0	0	0	0	0	0	0	0	0	0	0	0	0	0	0	0	0	0	1136.36	2272.73	0	0	0	0	0	0	777.001	0	0	0	0	0	0	0	0	0	0
Euchlanis dilatata	0	0	0	0	0	0	0	0	0	0	0	0	0	0	0	0	0	0	0	0	0	0	0	0	1515.15	3743.32	0	0	0	0	0	0	0	0	0	0	0	0	0	0	0	0	0	0	0	0	0	0	0
Tripleuchlanis plicata	0	0	0	0	0	0	0	0	0	0	0	0	0	0	0	0	0	0	0	0	0	0	0	0	0	0	0	0	0	0	0	0	0	0	0	0	0	0	0	0	0	0	0	0	0	0	0	0	0
Lacinularia elliptica	0	0	0	0	0	0	0	0	0	0	0	0	0	0	0	0	0	0	0	0	0	0	0	0	0	0	0	0	0	0	0	0	0	0	0	0	0	0	0	0	0	0	0	0	0	0	0	0	0
Ptygura sp.	0	0	15442.9	0	0	0	0	2727.27	0	0	0	0	0	0	0	0	6363.64	0	0	0	0	0	0	0	0	0	0	0	0	0	0	0	0	0	0	0	0	0	0	0	0	0	0	0	0	0	0	0	0
Sinantherina ariprepes	0	0	0	0	0	0	0	0	0	0	0	0	0	0	0	0	0	0	0	0	0	0	0	0	0	0	0	0	0	0	0	0	0	0	0	0	0	0	0	0	0	0	0	0	0	0	0	0	0
Ascomorpha sp.	0	2913.75	0	0	0	1010.1	0	0	9090.91	0	0	757.576	0	0	0	0	0	1136.36	0	320.856	662.879	17482.5	3093.43	371.901	0	0	0	0	473.485	0	1136.36	0	0	0	0	0	0	0	0	0	883.838	0	0	0	0	0	194.805	0	0
Gastropus hyptopus	0	582.751	0	0	0	0	0	0	0	0	0	0	0	0	0	0	0	0	0	0	0	0	0	0	0	0	0	0	0	0	0	0	0	0	0	0	0	0	0	0	0	0	0	0	0	0	0	0	0
Hexarthra sp.	0	0	1456.88	0	0	0	0	0	0	0	0	0	0	0	0	0	0	0	0	0	0	0	0	0	6060.61	2139.04	0	1262.63	473.485	267.38	2272.73	0	743.802	389.61	0	545.455	0	1101.93	0	0	0	0	0	0	0	0	779.221	0	0
Lecane bulla	0	0	0	0	0	0	0	0	0	0	0	0	0	0	0	0	0	0	0	0	0	0	0	0	0	0	0	0	0	0	0	0	0	0	0	0	0	0	0	0	0	0	0	0	0	0	0	0	0
Lecane cornuta	0	0	0	0	0	0	0	0	0	0	0	0	0	0	0	0	0	0	0	0	0	0	0	0	0	0	0	0	0	0	0	0	0	0	0	0	0	0	0	0	0	0	0	0	0	0	0	0	0
Lecane curvicornis	0	0	0	0	0	0	0	0	0	0	0	0	0	0	0	0	0	0	0	0	0	0	0	0	0	0	0	0	0	0	0	0	0	0	0	0	0	0	0	0	0	0	0	0	0	0	0	0	0
Lecane flexilis	0	0	0	0	0	0	0	0	0	0	0	0	0	0	0	0	0	0	0	0	0	0	0	0	0	0	0	0	0	0	0	0	0	0	0	0	0	0	0	0	0	0	0	0	0	0	0	0	0
Lecane ludwigii	0	0	0	0	0	0	0	0	0	0	0	0	0	0	0	0	0	0	0	0	0	0	0	0	0	0	0	0	0	0	0	0	0	0	0	0	0	0	0	0	0	0	0	0	0	0	0	0	0
Lecane luna	0	0	0	0	0	0	0	0	0	0	0	0	0	0	0	0	0	0	0	0	0	0	0	0	0	0	0	0	0	0	0	0	0	0	0	0	0	0	0	0	0	0	0	0	0	0	194.805	0	0
Lecane lunaris	0	0	0	0	0	0	0	0	0	0	0	0	0	0	0	0	0	0	0	0	0	0	0	0	0	0	0	0	0	0	0	0	0	0	0	0	0	0	0	0	0	0	0	0	0	0	0	0	0
Lecane monostyla	0	0	0	0	0	0	0	0	0	0	0	0	0	0	0	0	0	0	0	0	0	0	0	0	0	0	0	0	0	0	0	0	0	0	0	0	0	0	0	0	0	0	0	0	0	0	0	0	0
Lecane murrayi	0	0	0	0	0	0	0	0	0	0	0	0	0	0	0	0	0	0	0	0	0	0	0	0	0	0	0	0	0	0	0	0	0	0	0	0	0	0	0	0	0	0	0	0	0	0	0	0	0
Lecane proiecta	0	0	0	0	0	0	1082.25	0	0	0	0	0	0	0	0	0	0	0	0	0	0	0	0	0	0	0	0	0	0	0	0	0	0	0	0	0	0	0	0	0	0	0	0	0	0	0	0	0	0
Lecane signifera	0	0	0	0	0	0	0	0	0	0	0	0	0	0	0	0	0	0	0	0	0	0	0	0	0	0	0	0	0	0	0	0	0	0	0	0	0	0	0	0	0	0	0	0	0	0	0	0	0
Lecane stenroosi	0	0	0	0	0	0	0	0	0	0	0	0	0	0	0	0	0	0	0	0	0	0	0	0	0	0	0	0	0	0	0	0	0	0	0	0	0	0	0	0	0	0	0	0	0	0	0	0	0
Lecane stichaea	0	0	0	0	0	0	0	0	0	0	0	0	0	0	0	0	0	0	0	0	0	0	0	0	0	0	0	0	0	0	0	0	0	0	0	0	0	0	0	0	0	0	0	0	0	0	0	0	0
Lecane sp.	0	0	0	0	0	0	0	0	2272.73	0	0	0	0	0	0	0	0	0	0	0	0	0	0	0	0	0	0	0	0	0	0	0	0	0	0	0	0	0	0	0	0	0	0	0	0	0	0	0	0
Lepadella sp.	0	0	0	0	0	0	0	0	0	0	0	1262.63	0	0	0	727.273	0	0	0	0	0	0	0	0	0	0	0	0	0	0	0	0	2975.21	194.805	0	0	2272.73	0	0	0	0	0	0	0	0	0	0	0	0
Cephalodella forficula	0	0	0	0	0	0	0	0	0	0	0	0	0	0	0	0	0	0	0	0	0	0	0	0	0	0	0	0	0	0	0	0	0	0	0	0	0	0	0	0	0	0	0	0	0	0	0	0	0
Cephalodella sp.	0	0	0	0	0	0	0	0	0	0	0	0	0	0	0	0	0	0	0	0	0	0	0	0	0	0	0	0	0	0	0	0	0	0	0	0	0	0	0	0	1767.68	0	0	0	0	0	0	0	0
Monommata sp.	0	0	0	0	0	0	0	0	0	0	0	0	0	0	0	0	0	0	0	0	0	0	0	0	0	0	0	0	0	0	0	0	0	0	0	0	0	0	0	0	0	0	0	0	0	0	0	0	0
Notommata copeus	0	0	0	0	0	0	0	0	0	0	0	0	0	0	0	0	0	0	0	0	0	0	0	0	0	0	0	0	0	0	0	0	0	0	0	0	0	0	0	0	0	0	0	0	0	0	0	0	0
Notommata sp.	0	0	0	0	0	0	0	0	0	0	0	0	0	0	0	0	0	0	0	0	0	0	0	0	0	0	0	0	0	0	0	0	0	0	0	0	0	0	0	0	0	0	0	0	0	0	0	0	0
Dissotrocha sp.	0	0	0	0	0	0	0	0	0	0	0	0	0	0	0	0	0	0	0	0	0	0	0	0	0	0	0	0	0	0	0	0	0	0	0	0	0	0	0	0	0	0	0	0	0	0	0	0	0
Ploesoma truncatum	0	0	0	0	0	1010.1	0	0	0	2272.73	4599.57	1010.1	3030.3	0	7655.5	0	0	0	0	0	0	582.751	0	0	1515.15	18716.6	0	0	473.485	0	0	2272.73	5702.48	0	0	272.727	0	0	0	0	6186.87	31818.2	143.541	0	0	0	0	5903.19	0
Polyarthra sp.	1750	13986	1748.25	962.567	0	2272.73	7034.63	389.61	54545.5	56818.2	34956.7	16666.7	35151.5	53267	23445	10424.2	909.091	31250	2367.42	2406.42	11268.9	1748.25	0	247.934	0	0	0	1262.63	0	0	0	0	0	0	0	0	0	0	0	0	5303.03	0	0	151.515	0	0	0	0	0
Synchaeta sp.	318.182	6410.26	0	802.139	0	0	1623.38	0	45454.5	11363.6	10119	757.576	13333.3	12784.1	10526.3	5333.33	0	568.182	473.485	2406.42	9943.18	8741.26	4419.19	495.868	1515.15	0	0	0	0	0	3409.09	43181.8	10661.2	2532.47	0	1363.64	9090.91	0	0	0	14141.4	8333.33	0	0	0	0	0	0	0
Pompholyx complanata	0	0	0	0	0	0	0	0	0	0	0	0	0	0	0	0	0	0	0	0	0	0	0	0	0	0	0	0	0	0	0	0	0	0	0	0	0	0	0	0	0	0	0	0	0	0	0	0	0
Testudinella patina	0	0	0	0	0	0	0	0	0	0	0	0	0	0	0	0	0	0	0	0	0	0	0	0	0	0	0	0	0	0	0	0	0	0	0	0	0	0	0	0	0	0	0	0	0	0	0	0	0
Testudinella sp.	0	0	0	0	0	0	0	0	0	0	0	0	0	0	0	0	0	0	0	0	0	0	0	0	0	0	0	0	0	534.759	0	0	0	0	0	0	0	0	0	0	0	0	430.622	0	0	0	0	590.319	0
Trichocerca bicristata	0	0	0	0	0	0	0	0	0	0	0	0	0	0	0	0	0	0	0	0	0	0	0	0	0	0	0	0	0	0	0	0	0	0	0	0	0	0	0	0	0	0	0	0	0	0	0	0	0
Trichocerca bidens	0	0	0	0	0	0	0	0	0	0	0	0	0	0	0	0	0	0	0	0	0	0	0	0	0	0	0	0	0	0	0	0	0	0	0	0	0	0	0	0	0	0	0	0	0	0	0	0	0
Trichocerca capucina	0	0	0	0	0	0	0	0	0	0	0	0	0	0	0	0	0	0	0	0	0	0	0	0	0	0	0	0	0	0	0	0	0	0	0	0	0	0	0	0	0	0	0	0	0	0	0	0	0
Trichocerca cylindrica	636.364	0	0	160.428	101.01	1010.1	2164.5	194.805	0	4545.45	4599.57	2272.73	3030.3	2130.68	956.938	242.424	0	1136.36	0	160.428	0	0	0	0	0	0	891.266	2525.25	0	7754.01	0	6818.18	0	0	0	0	0	0	0	2020.2	0	0	0	0	0	1515.15	0	0	0
Trichocerca insulana	0	0	0	0	0	0	0	0	0	0	0	0	0	0	0	0	0	0	0	0	0	0	0	0	0	0	0	0	0	0	0	0	0	0	0	0	0	0	0	0	0	0	0	0	0	0	0	0	0
Trichocerca multicrinis	0	0	0	0	0	0	0	0	0	0	0	0	0	0	0	0	0	0	0	0	0	0	0	0	0	0	0	0	0	0	0	0	0	0	0	0	0	0	0	0	0	0	0	0	0	0	0	0	0
Trichocerca myersi	0	0	0	0	0	0	0	0	0	0	0	0	0	0	0	0	0	0	0	0	0	0	0	0	0	0	0	0	0	0	0	0	0	0	0	0	0	0	0	0	0	0	0	0	0	0	0	0	0
Trichocerca similis	0	0	0	0	0	0	0	0	0	0	0	0	0	0	0	0	0	0	0	0	0	0	0	0	0	0	0	0	0	0	0	0	0	0	0	0	0	0	0	0	0	0	0	0	0	0	0	0	0
Trichocerca stylata	0	0	0	0	0	0	0	0	0	0	0	0	0	0	0	0	0	0	0	0	0	0	0	0	0	0	0	0	0	0	0	0	0	0	0	0	0	0	0	0	0	0	0	0	0	0	0	0	0
Trichocerca sp.	0	0	0	0	0	252.525	0	0	0	0	0	0	0	0	0	0	0	0	0	0	0	0	0	0	0	0	0	0	0	0	0	0	0	0	0	0	0	0	0	0	21212.1	0	0	0	0	0	0	0	0
Macrochaetus sericus	0	0	0	0	0	0	0	0	0	0	0	0	0	0	0	0	0	0	0	0	0	0	0	0	0	0	0	0	0	0	0	0	0	0	0	0	0	0	0	0	0	0	0	0	0	0	0	0	0
Macrochaetus sp.	0	0	0	0	0	0	0	0	0	0	0	0	0	0	0	0	0	0	0	0	0	0	0	0	0	0	0	0	0	0	0	0	0	0	0	0	0	0	0	0	0	0	0	0	0	0	0	0	0
Trichotria tetractis	0	0	0	0	0	0	0	0	0	0	0	0	0	0	0	0	0	568.182	0	0	0	0	0	0	0	0	0	0	0	0	0	0	0	0	0	0	0	0	0	0	0	0	0	0	0	0	0	0	974.026
Horaella brehmi	0	0	0	0	0	0	4870.13	0	0	0	0	0	0	0	0	0	0	0	0	0	0	0	0	0	0	0	0	0	0	0	0	0	0	0	0	0	0	0	0	0	0	0	0	0	0	0	0	0	0
Filinia longiseta	0	0	0	1764.71	0	0	0	1266.23	0	0	0	0	0	0	478.469	0	0	0	0	0	0	0	0	0	3030.3	0	0	0	0	0	0	0	0	0	0	0	0	0	0	0	0	0	0	151.515	0	0	0	0	0
Filinia opoliensis	0	1748.25	0	0	0	0	0	0	0	0	0	0	0	0	0	0	0	0	0	0	0	0	0	0	0	0	0	0	0	0	0	0	0	0	0	0	0	0	0	0	0	2272.73	143.541	0	0	0	0	0	0
Filinia terminalis	0	0	0	0	0	0	0	0	0	2272.73	0	0	0	0	0	0	0	0	0	0	0	0	0	0	0	0	0	0	0	0	0	0	0	0	0	0	0	0	0	0	0	0	0	0	0	0	0	0	0
Bosmina hagmanni	477.273	20396.3	6993.01	6577.54	3434.34	11616.2	1623.38	1850.65	31818.2	56818.2	2759.74	3030.3	6666.67	5681.82	2870.81	3151.52	0	19886.4	19412.9	3368.98	10606.1	6410.26	13257.6	3719.01	1515.15	3743.32	0	2525.25	2367.42	0	0	4545.45	8181.82	584.416	1893.94	1090.91	3409.09	4407.71	2719.5	5050.51	2651.52	4545.45	2296.65	6969.7	14718.6	25757.6	2727.27	7083.83	2337.66
Bosmina haueronensis	0	582.751	0	0	0	0	9740.26	4967.53	2272.73	34090.9	0	0	0	3551.14	1913.88	1696.97	0	4545.45	0	0	0	0	0	0	0	0	0	1262.63	473.485	0	1136.36	2272.73	0	0	0	0	0	0	0	0	0	0	0	0	10389.6	18181.8	0	0	0
Bosmina freyi	0	0	0	0	0	0	0	0	0	0	0	0	0	0	0	0	0	0	0	0	0	0	0	0	0	0	0	0	0	0	0	0	0	0	946.97	272.727	0	0	0	0	0	0	0	0	0	0	0	0	0
Bosmina longirostris	0	0	0	0	0	0	0	0	0	0	0	0	0	0	0	0	0	0	0	0	0	0	0	0	0	0	0	0	0	0	0	0	0	0	0	0	0	0	0	0	0	0	0	0	0	0	0	0	0
Bosminopsis deitersi	0	4662	291.375	0	202.02	0	541.126	97.4026	4545.45	0	919.913	252.525	606.061	0	0	0	0	0	0	0	662.879	0	0	0	0	0	0	0	0	0	0	0	1239.67	0	0	0	0	0	0	0	883.838	2272.73	143.541	0	0	0	974.026	0	0
Alona guttata	0	0	0	0	0	0	0	0	0	0	0	0	0	0	0	0	0	0	0	0	0	0	0	0	0	0	0	0	0	0	0	0	0	0	0	0	0	0	0	0	0	0	0	0	0	0	0	0	0
Alona sp.	0	0	0	0	0	0	0	0	0	0	0	0	0	0	0	0	0	0	0	0	0	0	0	0	0	0	0	0	0	0	0	0	0	0	0	0	0	0	0	0	0	0	0	0	0	0	0	0	0
Alonella dadayi	0	0	0	0	0	0	0	0	0	0	0	0	0	0	0	0	0	0	0	0	0	0	0	0	0	0	0	0	0	0	0	0	0	0	0	0	0	0	0	0	0	0	0	0	0	0	0	0	0
Chydorus eurynotus	0	0	0	0	0	0	0	0	0	0	0	0	0	0	0	0	0	0	0	0	0	0	0	0	0	0	0	0	0	0	0	0	0	0	0	0	0	0	0	0	0	0	0	0	0	0	0	0	0
Coronatella poppei	0	0	0	0	0	0	0	0	0	0	0	0	0	0	0	0	0	0	0	0	0	0	0	0	0	0	0	0	0	0	0	0	0	0	0	0	0	0	0	0	0	0	0	0	0	0	0	0	0
Euryalona orientalis	0	0	0	0	0	0	0	0	0	0	0	0	0	0	0	0	0	0	0	0	0	0	0	0	0	0	0	0	0	0	0	0	0	0	0	0	0	0	0	0	0	0	0	0	0	0	0	0	0
Leydigia ipojucae	0	0	0	0	0	0	0	0	0	0	0	0	606.061	0	0	0	0	0	0	0	0	0	0	0	0	0	0	0	0	0	0	0	0	0	0	0	0	0	0	0	0	0	0	0	0	0	0	0	0
Magnospina dentifera	0	0	0	0	0	0	0	0	0	0	0	0	0	0	0	0	0	0	0	0	0	0	0	0	0	0	0	0	0	0	0	0	0	0	0	0	0	0	0	0	0	0	0	0	0	0	0	590.319	0
Ovalona glabra	0	0	0	0	0	0	0	0	0	0	0	0	0	0	0	0	0	0	0	0	0	0	0	0	0	0	0	0	0	0	0	0	0	0	0	0	0	0	0	0	0	0	0	0	0	0	0	0	0
Ceriodaphnia cornuta	2227.27	1748.25	3787.88	1283.42	505.051	505.051	1082.25	389.61	81818.2	2272.73	11039	2272.73	9090.91	18465.9	2392.34	5575.76	70000	22727.3	37878.8	4812.83	46401.5	26223.8	15467.2	3099.17	28787.9	4278.07	24064.2	29040.4	4734.85	18716.6	44318.2	52272.7	13884.3	5259.74	24621.2	3272.73	9090.91	30854	6993.01	17171.7	10606.1	15151.5	3301.44	1212.12	23376.6	28787.9	779.221	12987	584.416
Ceriodaphnia silvestrii	2068.18	0	0	962.567	909.091	1515.15	5411.26	2142.86	27272.7	4545.45	5519.48	3535.35	19393.9	19886.4	16746.4	10909.1	9090.91	3977.27	10416.7	481.283	7291.67	5827.51	17676.8	6818.18	4545.45	10695.2	25846.7	27777.8	14204.5	6684.49	43181.8	50000	3471.07	7012.99	12310.6	3545.45	3409.09	5509.64	2331	6060.61	8838.38	29545.5	1148.33	909.091	0	0	1363.64	0	1948.05
Daphnia gessneri	795.455	1165.5	1748.25	802.139	303.03	505.051	0	584.416	38636.4	4545.45	6439.39	1262.63	9696.97	5681.82	6220.1	3151.52	1818.18	1704.55	2840.91	320.856	3314.39	1748.25	2651.52	247.934	9090.91	4812.83	4456.33	5050.51	1420.45	267.38	1136.36	9090.91	5950.41	3116.88	1893.94	1363.64	3409.09	6611.57	777.001	2020.2	2651.52	12121.2	1148.33	0	6060.61	9090.91	584.416	0	974.026
Daphnia laevis	0	0	0	0	0	0	0	0	0	0	0	0	0	0	0	0	0	0	0	0	0	0	0	0	0	0	0	0	0	0	0	0	0	0	0	0	0	0	0	0	0	0	0	0	0	0	0	0	0
Daphnia parvula	0	0	0	0	0	0	0	0	0	0	0	0	0	0	0	0	0	0	0	0	0	0	0	0	0	0	0	0	0	0	0	0	0	0	0	0	0	0	0	0	0	0	0	0	0	0	0	0	0
Simocephalus vetulus	0	0	0	0	0	0	0	0	0	0	0	0	0	0	0	0	0	0	0	0	0	0	0	0	0	0	0	0	0	0	0	0	0	0	0	0	0	0	0	0	0	0	0	0	0	0	0	0	0
Macrothrix laticornis	0	0	0	0	0	0	0	0	0	0	0	0	0	0	0	0	0	0	0	0	0	0	0	0	0	0	0	0	0	0	0	0	0	0	0	0	0	0	0	0	0	0	0	0	0	0	0	0	0
Moina micrura	0	0	0	0	0	0	0	0	0	0	0	0	0	0	0	0	0	0	0	0	0	0	0	0	0	0	0	0	0	0	0	0	0	0	0	0	0	0	0	0	0	0	0	0	0	0	0	0	0
Moina minuta	795.455	0	1748.25	802.139	303.03	0	1082.25	194.805	81818.2	2272.73	3679.65	4040.4	4848.48	3551.14	2870.81	7757.58	10000	19886.4	2840.91	481.283	1988.64	5244.76	441.919	123.967	1515.15	3208.56	3565.06	10101	1420.45	1871.66	11363.6	18181.8	4958.68	1753.25	5681.82	1090.91	14772.7	5509.64	6604.51	12121.2	883.838	3030.3	574.163	151.515	10389.6	15151.5	0	0	584.416
Diaphanosoma birgei	0	0	291.375	0	0	0	0	0	0	0	0	0	0	0	0	0	0	0	0	0	0	0	0	0	0	0	0	0	0	0	0	0	0	0	0	0	0	0	0	0	0	0	0	0	6060.61	1515.15	0	0	0
Diaphanosoma brevireme	0	2913.75	291.375	160.428	0	2525.25	1623.38	0	0	0	0	0	0	0	0	0	0	0	0	0	0	0	0	0	0	0	0	3787.88	0	0	0	6818.18	0	0	0	272.727	0	0	0	0	2651.52	0	143.541	0	0	12121.2	0	5903.19	0
Diaphanosoma spinulosum	0	0	0	0	0	0	0	0	2272.73	0	3679.65	0	1818.18	4971.59	956.938	242.424	0	0	0	0	2651.52	2331	441.919	247.934	0	1604.28	0	0	473.485	0	7954.55	0	0	389.61	0	1909.09	2272.73	4407.71	388.5	0	0	757.576	0	454.545	0	0	0	0	389.61
Nauplii Cyclopoida	795.455	8741.26	582.751	962.567	0	1010.1	2164.5	292.208	13636.4	104545	8279.22	1515.15	6060.61	2840.91	2392.34	727.273	0	28409.1	21306.8	8021.39	47727.3	13986	3093.43	0	10606.1	18716.6	3565.06	7575.76	6155.3	0	4545.45	9090.91	5206.61	2142.86	1893.94	4909.09	1136.36	15427	1165.5	4040.4	52146.5	25000	3588.52	4090.91	51948.1	87878.8	7987.01	24203.1	8766.23
Copepodit Cyclopoida	318.182	4079.25	2331	481.283	808.081	252.525	1082.25	487.013	2272.73	13636.4	0	0	0	0	0	484.848	0	568.182	1893.94	320.856	662.879	2913.75	4419.19	495.868	0	534.759	891.266	1262.63	0	0	3409.09	4545.45	1239.67	1168.83	7575.76	545.455	2272.73	2203.86	388.5	0	4419.19	3030.3	1578.95	454.545	70129.9	48484.8	8961.04	14758	194.805
Acanthocyclops robustus	0	0	0	0	0	0	0	0	0	0	0	0	0	0	0	0	0	0	0	0	0	0	0	0	0	0	0	0	0	0	0	0	0	0	0	0	0	0	0	0	0	0	0	0	0	0	0	0	0
Mesocyclops longisetus	0	0	0	0	0	0	0	0	0	0	0	0	0	0	0	0	0	0	0	0	0	0	0	0	0	0	0	0	0	0	0	0	0	0	0	0	0	0	0	0	0	0	0	0	0	0	0	0	0
Mesocyclops meridianus	0	0	0	0	0	0	0	0	0	0	0	0	0	0	0	0	0	0	0	0	0	0	0	0	0	0	0	0	0	0	0	0	0	0	0	0	0	0	0	0	0	0	0	0	0	0	0	0	0
Mesocyclops sp.	0	0	0	0	202.02	0	2164.5	292.208	2272.73	0	919.913	252.525	1212.12	0	0	484.848	909.091	0	1893.94	0	0	582.751	441.919	371.901	1515.15	0	0	2525.25	0	0	0	2272.73	0	0	0	0	0	2203.86	0	0	0	0	0	0	0	0	0	0	0
Paracyclops chiltoni	0	0	0	0	0	0	0	0	0	0	0	0	0	0	0	0	0	0	0	0	0	0	0	0	0	0	0	0	0	0	0	0	0	0	0	0	0	0	0	0	0	0	0	0	0	0	0	0	0
Thermocyclops decipiens	35318.2	0	0	160.428	0	1010.1	0	292.208	0	0	919.913	0	0	0	0	242.424	0	0	946.97	0	1325.76	0	0	247.934	0	0	0	0	473.485	0	0	2272.73	3719.01	779.221	1893.94	272.727	0	0	0	2020.2	0	757.576	0	303.03	0	1515.15	0	0	0
Thermocyclops minutus	477.273	582.751	0	0	0	0	0	0	0	0	0	252.525	0	0	0	0	0	0	0	160.428	662.879	0	0	0	0	0	0	0	0	0	0	0	0	0	0	0	0	1101.93	0	0	0	1515.15	1291.87	0	6060.61	4545.45	194.805	590.319	0
Nauplii Calanoida	1909.09	6993.01	8158.51	2085.56	1717.17	2020.2	4870.13	389.61	22727.3	27272.7	3679.65	1262.63	6666.67	2840.91	1913.88	2424.24	1818.18	2272.73	3314.39	2245.99	8617.42	1748.25	3093.43	2479.34	53030.3	24064.2	22281.6	11363.6	19886.4	7486.63	42045.5	104545	7190.08	10714.3	31250	5454.55	4545.45	22038.6	6993.01	9090.91	35353.5	12878.8	1148.33	606.061	19047.6	0	779.221	17709.6	4090.91
Copepodit Calanoida	6522.73	0	13111.9	6577.54	2727.27	11868.7	17316	2629.87	65909.1	9090.91	1839.83	3282.83	4848.48	2840.91	1435.41	1939.39	60000	11363.6	5208.33	5133.69	14583.3	5827.51	15467.2	3966.94	166667	35294.1	75757.6	95959.6	30776.5	6951.87	113636	213636	2727.27	25324.7	88068.2	47454.5	144318	131129	57886.6	125253	15909.1	12878.8	8181.82	3939.39	53679.7	83333.3	4285.71	30696.6	10519.5
Argyrodiaptomus azevedoi	0	582.751	0	0	202.02	1010.1	0	97.4026	0	0	0	0	0	710.227	0	0	909.091	0	0	0	0	0	0	0	0	0	0	0	0	0	0	0	0	194.805	0	0	0	0	0	0	0	0	143.541	0	0	0	0	0	0
Argyrodiaptomus furcatus	0	0	0	0	0	0	0	0	2272.73	0	0	0	0	0	0	0	0	0	0	0	0	0	0	0	0	0	0	0	0	0	0	0	0	0	0	0	0	0	0	0	883.838	0	143.541	0	0	1515.15	0	0	0
Notodiaptomus anisitsi	0	0	0	0	0	0	0	0	0	0	0	0	0	0	0	0	0	0	0	0	0	0	0	0	0	0	0	0	0	0	0	0	247.934	194.805	0	0	0	0	0	0	0	0	0	0	0	0	0	0	0
Notodiaptomus deitersi	0	0	0	0	0	0	0	0	0	0	0	0	0	0	0	0	0	0	0	0	0	0	0	0	0	0	0	0	0	0	0	0	0	0	0	0	0	0	0	0	0	0	0	0	0	0	0	0	0
Notodiaptomus iheringi	0	0	0	0	0	0	0	0	0	0	0	0	0	0	0	0	909.091	0	0	0	0	0	0	371.901	0	0	0	0	1893.94	0	0	4545.45	0	194.805	946.97	0	0	0	0	0	0	0	0	0	0	0	0	0	0
Notodiaptomus henseni	159.091	0	291.375	481.283	505.051	757.576	1082.25	487.013	22727.3	4545.45	0	252.525	1212.12	710.227	478.469	1212.12	0	568.182	5208.33	320.856	1988.64	2331	441.919	247.934	6060.61	2673.8	2673.8	3787.88	1420.45	267.38	5681.82	2272.73	0	974.026	6628.79	3272.73	5681.82	11019.3	777.001	6060.61	0	0	1148.33	0	0	4545.45	194.805	0	389.61
Notodiaptomus transitans	0	582.751	582.751	481.283	404.04	1010.1	5411.26	1655.84	54545.5	0	1839.83	252.525	1818.18	710.227	0	969.697	15454.5	1704.55	2367.42	641.711	662.879	1165.5	1325.76	1859.5	1515.15	4812.83	13369	2525.25	3787.88	1871.66	6818.18	20454.5	991.736	2532.47	20833.3	4363.64	2272.73	29752.1	2331	7070.71	0	4545.45	143.541	151.515	13852.8	15151.5	0	590.319	1168.83
Notodiaptomus sp.	0	0	0	0	0	0	0	0	0	0	0	0	0	0	0	0	0	0	0	0	662.879	0	0	0	0	0	0	0	0	0	0	0	247.934	0	0	0	0	0	0	0	0	0	0	0	0	0	0	0	0
[truncated: 671 more columns]
